# Supplementary material for: Exceptional Response of Metastatic Chromophobe Renal Cell Carcinoma to Vascular Endothelial Growth Factor (VEGF) Inhibitors: Should Increased VEGF-C Expression Be Used to Guide Treatment?
Source: Case Rep Urol. 2019 Dec 28;2019:2479823. doi: 10.1155/2019/2479823 (PMC6949673; doi:10.1155/2019/2479823)
Supplement: Supplementary Materials — Supplementary Table 1: Gene expression log2 fold change versus normal renal tissue. [file 2479823.f1.xlsx]

## Sheet: Gene_expression_Log2_fold_chang
Supplemental Table 1. Gene expression log2 fold change versus normal renal tissue.
logFC	name	symbol	chr	loc
4.98805	alcohol dehydrogenase 4 (class II), pi polypeptide	ADH4	4	-99123656
1.82669	POU class 2 homeobox 3	POU2F3	11	120236639
2.93199	chitinase, acidic	CHIA	1	111290851
4.94763	ADP-ribosyltransferase 3	ART3	4	76074694
3.43693	uromodulin like 1	UMODL1	21	42071316
1.47131	FEZ family zinc finger 2	FEZF2	3	-62369671
1.96325	ZFP64 zinc finger protein	ZFP64	20	-52151277
1.79217	solute carrier family 6 member 4	SLC6A4	17	-30194318
2.61009	long intergenic non-protein coding RNA 933	LINC00933	15	84571133
-4.60138	sodium channel epithelial 1 gamma subunit	SCNN1G	16	23182718
2.81803	EGF like domain multiple 6	EGFL6	X	13569574
3.90043	parkin coregulated	PACRG	6	162727131
3.75906	odontogenic, ameloblast associated	ODAM	4	70196526
-1.51834	long intergenic non-protein coding RNA 2078	LINC02078	17	79707265
1.59873	chromosome 4 open reading frame 36	C4orf36	4	-86876204
4.29363	forkhead box I1	FOXI1	5	170105912
1.6094	kelch like family member 34	KLHL34	X	-21655348
1.48439	integrator complex subunit 4	INTS4	11	-77878719
1.02352	keratocan	KERA	12	-91050493
1.81042	HUS1 checkpoint clamp component	HUS1	7	-47963287
-1.01935	long intergenic non-protein coding RNA 1700	LINC01700	21	-38974428
1.8574	TXK tyrosine kinase	TXK	4	-48066392
1.09824	mohawk homeobox	MKX	10	-27672873
1.48149	long intergenic non-protein coding RNA 662	LINC00662	19	-27790492
1.75214	BLOC-1 related complex subunit 5	BORCS5	12	12357078
2.55619	uncharacterized LOC105376139	LOC105376139	9	NA
-3.8292	kininogen 1	KNG1	3	186717308
0.897177	uncharacterized LOC105376037	LOC105376037	9	NA
2.20319	chromosome 11 open reading frame 53	C11orf53	11	111255981
1.04643	EF-hand calcium binding domain 11	EFCAB11	14	-89923276
4.63767	alcohol dehydrogenase 1C (class I), gamma polypeptide	ADH1C	4	-99336491
1.58663	uncharacterized LOC399900	LOC399900	11	NA
3.61196	PDZ domain containing ring finger 4	PDZRN4	12	41437738
1.32201	solute carrier family 25 member 17	SLC25A17	22	-40769629
-3.28086	MALAT1 antisense transcript	TALAM1	11	-65499311
0.958294	uncharacterized LOC100272217	LOC100272217	9	-130577349
0.899256	zinc finger protein 417	ZNF417	19	-57905773
2.33317	transmembrane protein 117	TMEM117	12	43835860
-1.40941	jumonji domain containing 1C	JMJD1C	10	-63167220
3.16599	uncharacterized LOC102724156	LOC102724156	9	-88066435
2.22137	kelch repeat and BTB domain containing 3	KBTBD3	11	-106051097
0.949052	calcium binding protein 7	CABP7	22	29720354
-4.56395	potassium voltage-gated channel subfamily J member 16	KCNJ16	17	70075224
2.17823	WD repeat domain 20	WDR20	14	102139851
1.30796	chromosome 9 open reading frame 40	C9orf40	9	-74946582
-1.0205	uncharacterized LOC654841	LOC654841	2	-227221051
2.4954	epididymal sperm binding protein 1	ELSPBP1	19	47994650
2.09317	p21 (RAC1) activated kinase 5	PAK5	20	-9537389
-1.98676	transmembrane protein 45B	TMEM45B	11	129815780
2.32462	G protein subunit gamma transducin 1	GNGT1	7	93906507
2.16983	coiled-coil domain containing 126	CCDC126	7	23597378
-1.35309	SPART antisense RNA 1	SPART-AS1	13	36346430
1.14873	zinc finger protein 174	ZNF174	16	3401189
1.75587	uncharacterized LOC105373334	LOC105373334	X	NA
2.89921	mesenchyme homeobox 2	MEOX2	7	-15611211
2.77366	granulysin	GNLY	2	85694290
2.44144	lipase H	LIPH	3	-185507781
3.53801	myocardial zonula adherens protein	MYZAP	15	57591903
1.75439	RNA pseudouridylate synthase domain containing 2	RPUSD2	15	40569292
-4.35357	endomucin	EMCN	4	-100395340
1.04724	ferredoxin-fold anticodon binding domain containing 1	FDXACB1	11	-111874055
3.57113	doublesex and mab-3 related transcription factor 2	DMRT2	9	1050619
-1.10976	piwi like RNA-mediated gene silencing 2	PIWIL2	8	22275279
1.65032	ariadne RBR E3 ubiquitin protein ligase 2 opposite strand	ARIH2OS	3	-48917787
-1.29726	trace amine associated receptor 1	TAAR1	6	-132644897
1.71639	SMAD specific E3 ubiquitin protein ligase 1	SMURF1	7	-99027434
1.78243	diphosphoinositol pentakisphosphate kinase 1	PPIP5K1	15	-43533461
2.56296	uncharacterized LOC441086	LOC441086	5	74865892
3.74818	coiled-coil domain containing 151	CCDC151	19	-11420604
4.00671	BAALC, MAP3K1 and KLF4 binding	BAALC	8	103140692
2.98872	T cell activation RhoGTPase activating protein	TAGAP	6	-159034468
-2.29153	claudin 16	CLDN16	3	190387871
1.73295	SHQ1, H/ACA ribonucleoprotein assembly factor	SHQ1	3	-72749276
1.53427	NF-kappaB interacting lncRNA	NKILA	20	57710182
-1.52401	CD2 associated protein	CD2AP	6	47477788
-5.13936	claudin 10	CLDN10	13	95433598
-1.84722	La ribonucleoprotein domain family member 7	LARP7	4	112636963
2.31683	FH2 domain containing 1	FHDC1	4	152942982
3.53443	elongator acetyltransferase complex subunit 3	ELP3	8	28093066
1.4447	BAALC antisense RNA 2	BAALC-AS2	8	-103132962
3.46447	uncharacterized LOC105375624	LOC105375624	8	NA
3.41831	DPP10 antisense RNA 1	DPP10-AS1	2	-115144047
1.79565	long intergenic non-protein coding RNA 1977	LINC01977	17	79823451
1.63675	coiled-coil domain containing 134	CCDC134	22	41800621
-3.01076	transcription factor 21	TCF21	6	133889120
3.30023	phospholipase C gamma 2	PLCG2	16	81779257
0.955697	adaptor related protein complex 4 sigma 1 subunit	AP4S1	14	31025105
0.903906	histone deacetylase 8	HDAC8	X	-72329515
-1.85572	kinesin family member 5B	KIF5B	10	-32009009
2.79625	leucine rich repeat containing 31	LRRC31	3	-169839240
1.6237	deoxyhypusine synthase	DHPS	19	-12675716
1.58762	secretion regulating guanine nucleotide exchange factor	SERGEF	11	-17788049
-3.58022	aquaporin 2	AQP2	12	49950740
-4.07794	secreted frizzled related protein 1	SFRP1	8	-41261956
1.97146	uncharacterized LOC100049716	LOC100049716	12	630890
-2.79718	sodium channel epithelial 1 beta subunit	SCNN1B	16	23302269
-1.4073	long intergenic non-protein coding RNA 628	LINC00628	1	-204368429
4.01379	kallikrein related peptidase 15	KLK15	19	-50825288
1.1949	frataxin	FXN	9	69035562
1.45448	phosducin like	PDCL	9	-122818096
-0.677985	keratin 78	KRT78	12	-52837803
2.8157	dehydrogenase/reductase 7	DHRS7	14	-60144118
1.99058	translocase of inner mitochondrial membrane 10B	TIMM10B	11	6481446
-0.933596	NLR family pyrin domain containing 10	NLRP10	11	-7959608
-1.56113	RAB3A interacting protein like 1	RAB3IL1	11	-61897295
-3.54854	corticotropin releasing hormone binding protein	CRHBP	5	76952854
-0.814681	HORMA domain containing 2	HORMAD2	22	30080068
0.642699	uncharacterized LOC729652	LOC729652	16	-2464949
2.31869	TBC1 domain family member 14	TBC1D14	4	6987161
2.7837	coenzyme Q2, polyprenyltransferase	COQ2	4	-83263823
-1.95027	olfactory receptor family 10 subfamily H member 1	OR10H1	19	-15807006
-5.76696	LDL receptor related protein 2	LRP2	2	-169127108
3.44375	dipeptidyl peptidase like 10	DPP10	2	115162106
3.05291	cytochrome P450 family 11 subfamily A member 1	CYP11A1	15	-74337761
1.34044	gasdermin C	GSDMC	8	-129748195
-2.23585	long intergenic non-protein coding RNA 491	LINC00491	5	-102608491
-2.44141	interleukin 6 signal transducer	IL6ST	5	-55935096
1.26885	fukutin related protein	FKRP	19	46746045
-1.06318	olfactory receptor family 1 subfamily J member 2	OR1J2	9	122510801
-3.10544	olfactory receptor family 10 subfamily A member 5	OR10A5	11	6845682
1.0489	leucine rich repeat containing 15	LRRC15	3	-194355246
2.11092	ATP synthase, H+ transporting, mitochondrial Fo complex subunit s (factor B)	ATP5S	14	50312328
-1.14323	long intergenic non-protein coding RNA 32	LINC00032	9	-27245683
-1.12028	acidic nuclear phosphoprotein 32 family member C	ANP32C	4	-164197006
-2.10264	deoxynucleotidyltransferase terminal interacting protein 2	DNTTIP2	1	-93869457
3.9338	polypeptide N-acetylgalactosaminyltransferase 17	GALNT17	7	71132536
3.39106	tetraspanin 5	TSPAN5	4	-98470366
0.727569	coiled-coil domain containing 89	CCDC89	11	-85683843
3.42962	uncharacterized LOC101929480	LOC101929480	16	NA
-7.33673	uromodulin	UMOD	16	-20333050
4.96406	cystic fibrosis transmembrane conductance regulator	CFTR	7	117479962
-1.70542	transcription factor AP-2 beta	TFAP2B	6	50818725
1.48558	UTP14A, small subunit processome component	UTP14A	X	129906120
-1.64398	chloride intracellular channel 5	CLIC5	6	-45898452
2.77929	cytokine dependent hematopoietic cell linker	CLNK	4	-10486404
2.7984	pleckstrin 2	PLEK2	14	-67386978
1.88418	von Willebrand factor	VWF	12	-5948873
2.06189	TATA-box binding protein associated factor 7 like	TAF7L	X	-101268252
-0.774996	suppression of tumorigenicity 7 like	ST7L	1	-112541790
2.23375	holocytochrome c synthase	HCCS	X	11111285
3.03904	long intergenic non-protein coding RNA 323	LINC00323	21	-41141499
-2.05321	potassium voltage-gated channel subfamily J member 10	KCNJ10	1	-160037466
-1.15657	gap junction protein delta 2	GJD2	15	-34752440
1.65672	adenosine monophosphate deaminase 3	AMPD3	11	10450320
-0.923445	uncharacterized LOC101928144	LOC101928144	18	NA
1.19964	enhancer of mRNA decapping 3	EDC3	15	-74630557
-1.16884	long intergenic non-protein coding RNA 1741	LINC01741	1	177700523
-6.63081	calbindin 1	CALB1	8	-90058607
1.87833	protein arginine methyltransferase 7	PRMT7	16	68310950
-1.70172	proline rich protein BstNI subfamily 3	PRB3	12	-11265913
2.1925	SCAMP1 antisense RNA 1	SCAMP1-AS1	5	-78358763
1.52302	ribosomal protein L35 pseudogene 8	RPL35P8	22	NA
2.08375	coiled-coil-helix-coiled-coil-helix domain containing 7	CHCHD7	8	56211637
-2.26199	intraflagellar transport 88	IFT88	13	20566815
2.08925	ACVR2B antisense RNA 1	ACVR2B-AS1	3	-38451026
2.04518	doublecortin like kinase 2	DCLK2	4	150078273
-0.573938	ARHGAP22 intronic transcript 1	ARHGAP22-IT1	10	-48509851
1.36928	coenzyme Q7, hydroxylase	COQ7	16	19067916
0.85564	ubiquitin related modifier 1	URM1	9	128371318
3.62023	colorectal cancer associated 1	COLCA1	11	-111293388
1.94206	replication factor C subunit 2	RFC2	7	-74231501
-2.71536	WNK lysine deficient protein kinase 4	WNK4	17	42780630
1.33906	nucleoporin 160	NUP160	11	-47778082
1.28045	autophagy related 10	ATG10	5	81972024
-6.03127	aldolase, fructose-bisphosphate B	ALDOB	9	-101420559
1.29458	interleukin 17D	IL17D	13	20703342
2.06518	coiled-coil domain containing 127	CCDC127	5	-204759
1.34409	ubiquitin specific peptidase 28	USP28	11	-113797874
0.779336	chromosome 20 open reading frame 196	C20orf196	20	5750386
1.01423	CUGBP Elav-like family member 5	CELF5	19	3225484
1.74576	Fanconi anemia complementation group F	FANCF	11	-22622532
-1.12966	nectin cell adhesion molecule 4	NECTIN4	1	-161070990
1.52552	GATA binding protein 2	GATA2	3	-128479421
2.36421	uncharacterized LOC257396	LOC257396	5	53109841
1.59753	zinc finger FYVE-type containing 26	ZFYVE26	14	-67746519
-2.52926	small nucleolar RNA, H/ACA box 71B	SNORA71B	20	-38425194
1.00971	unc-13 homolog C	UNC13C	15	54012647
1.17729	long intergenic non-protein coding RNA 2126	LINC02126	16	-65141755
-0.989227	MPV17 mitochondrial inner membrane protein like	MPV17L	16	15395753
0.649412	potassium voltage-gated channel subfamily C member 1	KCNC1	11	17735947
-1.52129	uncharacterized LOC102723932	LOC102723932	9	NA
1.41539	carbohydrate sulfotransferase 2	CHST2	3	143119775
-1.57774	potassium voltage-gated channel modifier subfamily S member 1	KCNS1	20	-45091215
2.44697	LIM homeobox 9	LHX9	1	197917386
2.21605	sterol-C5-desaturase	SC5D	11	121292678
-2.45488	SLAM family member 6	SLAMF6	1	-160485029
1.49087	small integral membrane protein 7	SMIM7	19	-16646147
-0.766054	transmembrane serine protease 15	TMPRSS15	21	-18269115
3.80788	family with sequence similarity 174 member B	FAM174B	15	-92617448
0.859326	succinate dehydrogenase complex assembly factor 1	SDHAF1	19	35995187
-1.10747	TMEM72 antisense RNA 1	TMEM72-AS1	10	-44811023
3.3733	long intergenic non-protein coding RNA 1187	LINC01187	5	-170191646
-4.71445	glycine decarboxylase	GLDC	9	-6532463
-1.93298	peptidylprolyl isomerase G	PPIG	2	169584339
-1.7601	retinitis pigmentosa GTPase regulator	RPGR	X	-38269169
1.49786	tetratricopeptide repeat domain 9C	TTC9C	11	62728479
1.90278	FOXN3 antisense RNA 1	FOXN3-AS1	14	89417353
2.1572	family with sequence similarity 201 member A	FAM201A	9	38621087
1.82588	translocase of inner mitochondrial membrane 29	TIMM29	19	10928735
1.26636	zinc finger protein 777	ZNF777	7	-149431362
-1.96471	glycoprotein 2	GP2	16	-20309573
1.2297	uncharacterized LOC105370469	LOC105370469	14	NA
1.39446	uncharacterized FLJ31715	LOC152048	3	-37241790
-1.07817	tudor domain containing 12	TDRD12	19	32719772
-3.60935	protein phosphatase 1 regulatory inhibitor subunit 1A	PPP1R1A	12	-54579239
1.06889	zinc finger protein 677	ZNF677	19	-53235380
-2.07902	cilia and flagella associated protein 69	CFAP69	7	90245173
1.6233	peptidylprolyl cis/trans isomerase, NIMA-interacting 1	PIN1	19	9835206
-4.24778	NPHS2, podocin	NPHS2	1	-179550538
1.49286	spire type actin nucleation factor 2	SPIRE2	16	89828498
2.41625	pyruvate dehyrogenase phosphatase catalytic subunit 2	PDP2	16	66880360
1.55425	kallikrein related peptidase 3	KLK3	19	50854914
-0.726146	C1q and TNF related 9	C1QTNF9	13	24309577
1.54873	TRAF interacting protein	TRAIP	3	-49828594
2.02388	leucine rich repeat and fibronectin type III domain containing 3	LRFN3	19	35937119
2.77041	phosphorylase kinase regulatory subunit alpha 1	PHKA1	X	-72578813
1.43044	splicing factor 3b subunit 3	SF3B3	16	70523787
-1.01254	uncharacterized LOC101928894	LOC101928894	11	46171954
2.3901	inositol polyphosphate-5-phosphatase J	INPP5J	22	31122922
1.99503	Ral GTPase activating protein catalytic alpha subunit 2	RALGAPA2	20	-20389627
1.19148	methyltransferase like 16	METTL16	17	-2416053
-1.32166	taste 2 receptor member 39	TAS2R39	7	143183418
1.14116	high mobility group box 3 pseudogene 1	HMGB3P1	20	-34833574
-2.60048	sclerostin	SOST	17	-43753730
1.40417	ADAM metallopeptidase domain 12	ADAM12	10	-126041341
1.78742	nudix hydrolase 16 pseudogene 1	NUDT16P1	3	131361873
-2.0795	long intergenic non-protein coding RNA 520	LINC00520	14	-55781134
-1.79271	family with sequence similarity 182 member B	FAM182B	20	-25763452
3.51104	ATPase H+ transporting V0 subunit d2	ATP6V0D2	8	86098909
1.34141	VPS33B, late endosome and lysosome associated	VPS33B	15	-90998415
-1.46098	glutathione S-transferase theta 4	GSTT4	22	-234769
-1.2824	transmembrane protein 238 like	TMEM238L	17	-10794912
-1.62673	uncharacterized LOC105376405	LOC105376405	10	NA
-2.03151	testis expressed 48	TEX48	9	-114666433
1.05903	integrin alpha FG-GAP repeat containing 2	ITFG2	12	2812620
4.46874	solute carrier family 35 member F3	SLC35F3	1	233904711
-1.43545	sperm associated antigen 11B	SPAG11B	8	-7450563
1.42924	neuromedin B	NMB	15	-84655128
-1.01043	fibronectin type III domain containing 3A	FNDC3A	13	49110302
-1.22916	potassium voltage-gated channel subfamily A regulatory beta subunit 3	KCNAB3	17	-7921858
2.18264	uncharacterized LOC105374407	LOC105374407	4	NA
-0.859303	long intergenic non-protein coding RNA 1922	LINC01922	18	74409447
-1.21023	inhibin beta C subunit	INHBC	12	57434684
4.15052	serine peptidase inhibitor, Kazal type 7 (putative)	SPINK7	5	148312426
-0.875781	cilia and flagella associated protein 53	CFAP53	18	-50227193
-2.16353	prothymosin alpha pseudogene 4	PTMAP4	12	NA
-2.85637	solute carrier family 6 member 13	SLC6A13	12	-258988
-1.67254	karyopherin subunit alpha 3	KPNA3	13	-49699306
1.23064	BRF2, RNA polymerase III transcription initiation factor subunit	BRF2	8	-37843879
1.27438	mediator complex subunit 27	MED27	9	-131860109
-1.31265	LINC01225 pseudogene	LINC01225	1	31500084
1.57983	deoxyribonuclease 1	DNASE1	16	3652938
1.32019	MPV17 mitochondrial inner membrane protein like 2	MPV17L2	19	18193229
2.21284	SWI5 homologous recombination repair protein	SWI5	9	128275378
-1.93872	UFM1 specific ligase 1	UFL1	6	96521825
-0.687057	uncharacterized LOC101929586	LOC101929586	15	-80554610
1.06676	neuronal PAS domain protein 3	NPAS3	14	32939252
-1.57987	Wilms tumor 1	WT1	11	-32387775
1.9103	microtubule associated protein RP/EB family member 2	MAPRE2	18	35041359
1.2671	UBL7 antisense RNA 1 (head to head)	UBL7-AS1	15	74461264
-1.42037	pre-mRNA processing factor 40 homolog A	PRPF40A	2	-152651592
1.70428	serine palmitoyltransferase long chain base subunit 2	SPTLC2	14	-77505996
1.30358	coiled-coil domain containing 85C	CCDC85C	14	-99511265
-1.11209	ADAM metallopeptidase domain 21	ADAM21	14	70452156
1.38665	uncharacterized LOC90246	LOC90246	3	128507834
1.19024	ATPase H+ transporting V0 subunit a2	ATP6V0A2	12	123712317
-6.02562	aldehyde dehydrogenase 8 family member A1	ALDH8A1	6	-134917389
1.7627	cleavage stimulation factor subunit 1	CSTF1	20	56392650
0.958069	membrane associated guanylate kinase, WW and PDZ domain containing 1	MAGI1	3	-65354230
-0.745413	uncharacterized LOC153163	MGC32805	5	-122436496
1.80804	chromosome 12 open reading frame 43	C12orf43	12	-121002421
2.53178	inner mitochondrial membrane peptidase subunit 1	IMMP1L	11	-31432398
3.44301	transmembrane protein 35A	TMEM35A	X	101078846
1.43776	RFT1 homolog	RFT1	3	-53088484
1.04237	WD repeat domain 25	WDR25	14	100376475
0.811705	OTU deubiquitinase 7A	OTUD7A	15	-31501408
1.10989	CTD phosphatase subunit 1	CTDP1	18	79679800
3.89434	tumor protein p63 regulated 1	TPRG1	3	189171973
1.45886	tumor suppressor 2, mitochondrial calcium regulator	TUSC2	3	-50324908
1.89012	NADH:ubiquinone oxidoreductase core subunit S8	NDUFS8	11	68030616
2.01596	nudix hydrolase 1	NUDT1	7	2242221
1.58624	centrosomal protein 192kDa pseudogene	LOC643201	5	-176143084
-1.04567	long intergenic non-protein coding RNA 2226	LINC02226	5	-8333482
1.30045	uncharacterized LOC101928076	LOC101928076	6	NA
-0.906134	uncharacterized LOC101928306	LOC101928306	4	4920807
-2.061	ATPase 13A3	ATP13A3	3	-194402673
2.16268	translocase of inner mitochondrial membrane 8A	TIMM8A	X	-101345655
1.67988	small nucleolar RNA host gene 10	SNHG10	14	-95532911
-0.674579	WAP four-disulfide core domain 11	WFDC11	20	-45648562
-0.921647	taste 2 receptor member 38	TAS2R38	7	-141972630
2.02298	myelin oligodendrocyte glycoprotein	MOG	6	29656980
-2.07975	PKHD1, fibrocystin/polyductin	PKHD1	6	-51615346
-0.605078	interleukin 22 receptor subunit alpha 2	IL22RA2	6	-137143819
2.03725	NOP2/Sun RNA methyltransferase family member 5	NSUN5	7	-73302515
-2.55521	superoxide dismutase 3	SOD3	4	24795462
2.21234	NADH:ubiquinone oxidoreductase subunit B7	NDUFB7	19	-14566077
1.75872	family with sequence similarity 222 member A	FAM222A	12	109714381
-2.02909	zinc finger protein 638	ZNF638	2	71331754
1.93341	Morf4 family associated protein 1 like 1 pseudogene	LOC93622	4	6674093
1.3755	SUMO peptidase family member, NEDD8 specific	SENP8	15	72114257
1.25689	SIN3 transcription regulator family member A	SIN3A	15	-75369378
2.75924	syntrophin beta 1	SNTB1	8	-120535744
-0.703549	ankyrin and armadillo repeat containing	ANKAR	2	189675984
1.88692	bone morphogenetic protein 7	BMP7	20	-57168752
2.22176	serine/threonine kinase 32A	STK32A	5	147235015
2.52175	lin-37 DREAM MuvB core complex component	LIN37	19	35748360
-2.32659	deoxyribonuclease 1 like 3	DNASE1L3	3	-58192625
-3.1353	heparan sulfate 6-O-sulfotransferase 2	HS6ST2	X	-132626009
2.22466	uncharacterized LOC101927752	LOC101927752	8	-1761962
-0.848836	phosphoinositide kinase, FYVE-type zinc finger containing	PIKFYVE	2	208266266
2.42728	transmembrane protein 268	TMEM268	9	114611319
-4.03407	leucine rich repeat containing 19	LRRC19	9	-26993136
-1.02175	glycoprotein A33	GPA33	1	-167052835
-0.969967	miR-17-92a-1 cluster host gene	MIR17HG	13	91347819
1.4969	RNA terminal phosphate cyclase like 1	RCL1	9	4792833
1.12283	elaC ribonuclease Z 1	ELAC1	18	50968016
3.08948	ninjurin 2	NINJ2	12	-564295
1.36151	BCDIN3 domain containing RNA methyltransferase	BCDIN3D	12	-49836042
-1.06098	calcium homeostasis modulator family member 5	CALHM5	6	116511644
1.24098	SRR1 domain containing	SRRD	22	26483883
1.03408	zinc finger protein 846	ZNF846	19	-9751992
1.20792	nucleolar complex associated 4 homolog	NOC4L	12	132144426
1.37013	ER membrane protein complex subunit 3	EMC3	3	-9962679
1.28216	kinesin family member 22	KIF22	16	29790712
1.61079	aarF domain containing kinase 2	ADCK2	7	140673152
-2.14412	phospholipase C beta 1	PLCB1	20	8132264
0.99541	PDGFA associated protein 1	PDAP1	7	-99394675
2.84853	protein kinase C delta	PRKCD	3	53161206
2.18743	fem-1 homolog A	FEM1A	19	4791715
1.02038	eukaryotic translation initiation factor 1A domain containing	EIF1AD	11	-65996544
1.61925	NCK1 divergent transcript	NCK1-DT	3	-136841975
1.84834	adiponectin receptor 2	ADIPOR2	12	1691080
-0.689922	UMODL1 antisense RNA 1	UMODL1-AS1	21	-42102133
0.867434	lin-54 DREAM MuvB core complex component	LIN54	4	-82924603
2.40034	chromosome 9 open reading frame 24	C9orf24	9	-34379019
-1.83801	CWC22 spliceosome associated protein homolog	CWC22	2	-179944876
1.38037	chromosome 15 open reading frame 56	C15orf56	15	-40250664
-1.82938	TATA-box binding protein associated factor 1 like	TAF1L	9	-32629453
4.04008	uncharacterized LOC105373764	LOC105373764	2	177673321
1.13319	eukaryotic translation initiation factor 2B subunit epsilon	EIF2B5	3	184135021
-0.637566	taste 2 receptor member 41	TAS2R41	7	143477872
1.51896	anaphase promoting complex subunit 15	ANAPC15	11	-72109586
-0.800492	keratin associated protein 10-11	KRTAP10-11	21	44646413
0.834866	glutamate metabotropic receptor 1	GRM1	6	146027781
1.89381	Sjogren syndrome/scleroderma autoantigen 1	SSSCA1	11	65570458
1.66783	PR/SET domain 4	PRDM4	12	-107732865
0.936779	uncharacterized LOC101926994	LOC101926994	15	NA
1.96509	COX18, cytochrome c oxidase assembly factor	COX18	4	-73054695
1.09106	chromosome 3 open reading frame 33	C3orf33	3	-155762611
1.0594	zinc finger protein 837	ZNF837	19	-58367622
-0.9599	keratin 35	KRT35	17	-41476688
4.12372	calcitonin related polypeptide alpha	CALCA	11	-14968501
-0.865286	CYMP antisense RNA 1	CYMP-AS1	1	-110487679
1.03972	tetratricopeptide repeat domain 23	TTC23	15	-99136322
1.91679	family with sequence similarity 168 member A	FAM168A	11	-73400477
1.29614	GDNF inducible zinc finger protein 1	GZF1	20	23362131
-2.56206	fibroblast growth factor 1	FGF1	5	-142592177
0.91272	INO80 complex subunit	INO80	15	-40978880
1.37032	MCF2L antisense RNA 1	MCF2L-AS1	13	-112967483
4.53855	synaptogyrin 3	SYNGR3	16	1989944
1.75206	glycolipid transfer protein	GLTP	12	-109850942
-0.79709	NA	NA	NA	NA
2.14619	protein phosphatase, Mg2+/Mn2+ dependent 1L	PPM1L	3	160756203
1.39161	KxDL motif containing 1	KXD1	19	18557761
1.13533	autophagy related 7	ATG7	3	11272323
1.39134	single-strand-selective monofunctional uracil-DNA glycosylase 1	SMUG1	12	-54180357
0.804773	platelet activating factor acetylhydrolase 1b catalytic subunit 2	PAFAH1B2	11	117144283
-1.07485	RAPGEF4 antisense RNA 1	RAPGEF4-AS1	2	-172723189
-0.848205	HECT and RLD domain containing E3 ubiquitin protein ligase 4	HERC4	10	-67921898
-1.83433	corepressor interacting with RBPJ, 1	CIR1	2	-174348149
1.65459	NADH:ubiquinone oxidoreductase subunit C1	NDUFC1	4	-139289916
-0.611127	maltase-glucoamylase 2 (putative)	MGAM2	7	73628
-2.3526	uncharacterized LOC284578	LOC284578	1	-205554271
2.74797	colorectal cancer associated 2	COLCA2	11	111299250
1.41268	exosome component 2	EXOSC2	9	130693759
-0.628502	zinc finger protein 781	ZNF781	19	-37667748
-7.27983	solute carrier family 12 member 1	SLC12A1	15	48206300
1.1527	tuftelin interacting protein 11	TFIP11	22	-26491239
1.74358	zinc finger protein 45	ZNF45	19	-43912623
1.61545	integrator complex subunit 9	INTS9	8	-28767657
1.41759	inositol polyphosphate-4-phosphatase type I A	INPP4A	2	98444857
-1.17003	serpin family A member 9	SERPINA9	14	-94462720
1.61972	LDL receptor related protein 5 like	LRP5L	22	-25351417
1.1597	troponin I3, cardiac type	TNNI3	19	-55151767
-6.26458	klotho	KL	13	33016432
-1.53517	KH RNA binding domain containing, signal transduction associated 2	KHDRBS2	6	-61679959
1.61634	G protein subunit alpha 11	GNA11	19	3094409
1.49035	transcription factor AP-2 gamma	TFAP2C	20	56629301
2.55822	SIX homeobox 1	SIX1	14	-60644698
-1.29868	PROP paired-like homeobox 1	PROP1	5	-127080
-1.23206	CSMD2 antisense RNA 1	CSMD2-AS1	1	33868955
0.823215	A-Raf proto-oncogene, serine/threonine kinase	ARAF	X	47561099
3.31759	ATPase H+ transporting V1 subunit G3	ATP6V1G3	1	-198523221
1.28982	RALY heterogeneous nuclear ribonucleoprotein	RALY	20	33993651
4.03295	cAMP-dependent protein kinase inhibitor alpha	PKIA	8	78516100
-1.00777	HLA complex P5B (non-protein coding)	HCP5B	6	-29871894
-3.60763	WASH complex subunit 2C	WASHC2C	10	45727199
3.93843	Rh family C glycoprotein	RHCG	15	-89471408
3.08355	SVOP like	SVOPL	7	-138594284
2.97974	hes related family bHLH transcription factor with YRPW motif 1	HEY1	8	-79764009
-0.751932	serine rich single-pass membrane protein 1	SSMEM1	7	130207863
4.02243	FOXP4 antisense RNA 1	FOXP4-AS1	6	-41523894
-1.44615	uncharacterized LOC644090	LOC644090	7	151806661
1.16545	ring finger protein 14	RNF14	5	141966836
-0.825555	FAM212B antisense RNA 1	FAM212B-AS1	1	111739840
2.59901	BAI1 associated protein 2 like 1	BAIAP2L1	7	-98291649
1.58269	pellino E3 ubiquitin protein ligase family member 3	PELI3	11	66466864
1.1361	CDC42 effector protein 2	CDC42EP2	11	65314817
-2.06798	angiotensin II receptor type 1	AGTR1	3	148730179
1.49274	maestro heat like repeat family member 1	MROH1	8	144148015
-1.34207	IGF like family member 2	IGFL2	19	46147781
1.41201	developmentally regulated GTP binding protein 1	DRG1	22	31399552
-1.22708	lamin tail domain containing 1	LMNTD1	12	-25496315
4.61172	ubiquitin conjugating enzyme E2 Q family like 1	UBE2QL1	5	6448622
1.18742	tetraspanin 9	TSPAN9	12	3077354
1.22972	protein tyrosine phosphatase, non-receptor type 21	PTPN21	14	-88465777
3.06877	DnaJ heat shock protein family (Hsp40) member C9	DNAJC9	10	-73241955
1.40573	chromosome 19 open reading frame 70	C19orf70	19	-5678413
-4.99547	potassium voltage-gated channel subfamily J member 1	KCNJ1	11	-128838013
2.25524	leucine rich repeat containing 57	LRRC57	15	-42542521
-0.810892	tripartite motif containing 40	TRIM40	6	1391235
-0.750925	outer dense fiber of sperm tails 2 like	ODF2L	1	-86346823
1.68241	leucyl-tRNA synthetase	LARS	5	-146113025
-0.9493	sex determining region Y	SRY	Y	-2786854
3.7619	ependymin related 1	EPDR1	7	37920560
1.08448	protein arginine methyltransferase 8	PRMT8	12	3381348
1.43739	FRAT1, WNT signaling pathway regulator	FRAT1	10	97319264
-1.29758	uncharacterized LOC105376161	LOC105376161	9	NA
2.08577	fibrillin 3	FBN3	19	-8065401
2.8547	stromal antigen 3-like 4 (pseudogene)	STAG3L4	7	67302637
2.65907	aspartate beta-hydroxylase domain containing 2	ASPHD2	22	26429313
1.86649	long intergenic non-protein coding RNA 1607	LINC01607	8	79768141
-3.94286	PDZK1 interacting protein 1	PDZK1IP1	1	-47183588
0.94987	Ral GEF with PH domain and SH3 binding motif 1	RALGPS1	9	126914773
1.01464	GINS complex subunit 3	GINS3	16	58392393
-3.13644	dual specificity phosphatase 9	DUSP9	X	153642442
1.31828	ER membrane protein complex subunit 9	EMC9	14	-24138964
1.42711	zinc finger protein 317	ZNF317	19	9140379
-1.35278	spermatogenesis associated 12	SPATA12	3	57060440
1.55594	family with sequence similarity 118 member B	FAM118B	11	126211723
-2.46143	RAB11 family interacting protein 2	RAB11FIP2	10	-118004915
-3.1496	solute carrier family 12 member 3	SLC12A3	16	56865206
-1.93145	CCAAT enhancer binding protein zeta	CEBPZ	2	-37201630
-0.710043	proline rich 9	PRR9	1	153217583
-2.79509	histidine rich glycoprotein	HRG	3	186665951
1.8366	iron-sulfur cluster assembly 2	ISCA2	14	74493719
-2.60688	sphingolipid transporter 2	SPNS2	17	4498842
-0.960713	oxoeicosanoid receptor 1	OXER1	2	-42762498
-1.54256	protein phosphatase 4 regulatory subunit 3B	PPP4R3B	2	-55547291
-1.46222	origin recognition complex subunit 3	ORC3	6	87590066
-0.910268	G protein-coupled bile acid receptor 1	GPBAR1	2	218261014
0.994029	USP3 antisense RNA 1	USP3-AS1	15	-63587709
1.61006	TBC1 domain family member 1	TBC1D1	4	37891083
-1.11733	TEK receptor tyrosine kinase	TEK	9	27109140
-1.09731	CEBPA divergent transcript	CEBPA-DT	19	33302820
-1.26934	zinc finger protein 687	ZNF687	1	151282311
1.62864	coenzyme Q3, methyltransferase	COQ3	6	-99369471
2.0639	muscular LMNA interacting protein	MLIP	6	54018915
5.01761	HEPACAM family member 2	HEPACAM2	7	-93188540
1.66061	potassium voltage-gated channel subfamily Q member 1	KCNQ1	11	2461453
-0.961252	ATPase phospholipid transporting 11C	ATP11C	X	-139726345
1.48213	folate receptor 3	FOLR3	11	72135709
1.71334	CENPB DNA-binding domain containing 1	CENPBD1	16	-89969774
1.87151	transmembrane protein 106C	TMEM106C	12	47963546
-1.92259	muscleblind like splicing regulator 2	MBNL2	13	97222295
1.4437	KMT2E antisense RNA 1	KMT2E-AS1	7	-105010541
1.74585	transmembrane protein 203	TMEM203	9	-137204082
3.50453	uncharacterized LOC100505851	LOC100505851	19	-23949518
1.51384	uncharacterized LOC101928725	LOC101928725	15	-58768071
1.35293	replication protein A4	RPA4	X	96883907
1.83939	peroxisomal biogenesis factor 2	PEX2	8	-76980257
-1.49445	UBX domain protein 11	UBXN11	1	-26282281
2.2891	family with sequence similarity 189 member A2	FAM189A2	9	69324571
-1.95452	zinc finger protein 12	ZNF12	7	-6688433
1.65315	kelch like family member 26	KLHL26	19	18636964
0.726678	mesoderm development LRP chaperone	MESD	15	-80975744
1.51986	GRB2 associated binding protein 2	GAB2	11	-78215289
-1.13375	PZP, alpha-2-macroglobulin like	PZP	12	-9148839
1.88492	suppression of tumorigenicity 7	ST7	7	116953326
0.887673	zinc finger protein 821	ZNF821	16	-71859679
-1.22362	nescient helix-loop-helix 1	NHLH1	1	160367070
-0.974461	uncharacterized LOC101928525	LOC101928525	9	-135503272
1.51701	transmembrane protein 60	TMEM60	7	-77793727
1.71803	KRAB box domain containing 1	KRBOX1	3	42936341
1.83846	EMG1, N1-specific pseudouridine methyltransferase	EMG1	12	6970780
-2.25354	carbonic anhydrase 4	CA4	17	60149935
0.840105	zinc finger HIT-type containing 2	ZNHIT2	11	-65116402
1.11471	ribosomal protein L39 pseudogene 37	RPL39P37	19	NA
1.45601	zinc finger protein 490	ZNF490	19	-12576105
-0.95906	LHFPL3 antisense RNA 1	LHFPL3-AS1	7	-104796505
-0.819399	protein tyrosine phosphatase, receptor type N2	PTPRN2	7	-157539051
-0.910199	long intergenic non-protein coding RNA 1210	LINC01210	3	137771910
-0.463553	chromosome 15 open reading frame 54 (putative)	C15orf54	15	39250668
4.23178	synaptotagmin 17	SYT17	16	19167833
-1.10722	LTV1 ribosome biogenesis factor	LTV1	6	143843272
-4.33536	ankyrin 2	ANK2	4	113049413
1.62967	SLC25A5 antisense RNA 1	SLC25A5-AS1	X	-119466032
2.96287	kelch repeat and BTB domain containing 12	KBTBD12	3	127923058
-1.29373	neurofascin	NFASC	1	204828653
-1.27002	protocadherin beta 9	PCDHB9	5	141187126
1.24935	methionyl-tRNA synthetase	MARS	12	57487952
-0.817758	protein tyrosine kinase 6	PTK6	20	-63528422
2.05276	mediator complex subunit 6	MED6	14	-70583220
-1.25103	integrin subunit alpha 8	ITGA8	10	-15513948
1.94272	mitochondrial ribosomal protein S17	MRPS17	7	55951917
1.30977	glutaredoxin 5	GLRX5	14	95534985
-0.635282	solute carrier family 22 member 25	SLC22A25	11	-63163169
-1.07686	GIT ArfGAP 1	GIT1	17	-29573468
1.32735	exosome component 3	EXOSC3	9	-37779713
-0.987458	VPS52, GARP complex subunit	VPS52	6	-33250271
-1.07729	Abelson helper integration site 1	AHI1	6	-135283971
2.26379	7-dehydrocholesterol reductase	DHCR7	11	-71434410
1.03543	myotubularin related protein 1	MTMR1	X	150693363
1.07148	thioredoxin like 4A	TXNL4A	18	-79972866
-0.990377	zinc finger protein 326	ZNF326	1	89995094
1.1411	ZPR1 zinc finger	ZPR1	11	-116778188
1.09036	DEAH-box helicase 35	DHX35	20	38962337
3.42289	apolipoprotein B mRNA editing enzyme catalytic subunit 3B	APOBEC3B	22	38982398
2.71096	zinc finger and SCAN domain containing 31	ZSCAN31	6	-28324737
-0.927518	uncharacterized LOC101928273	LOC101928273	2	-137878753
-1.20559	ATP binding cassette subfamily A member 4	ABCA4	1	-93992837
-1.02106	small proline rich protein 2G	SPRR2G	1	-153149581
-1.48159	uncharacterized LOC100130264	LOC100130264	20	-19242301
0.894414	zinc finger protein 416	ZNF416	19	-57571565
-1.21958	gamma-aminobutyric acid type A receptor rho2 subunit	GABRR2	6	-89254465
-2.07368	glutathione S-transferase mu 3	GSTM3	1	-109733931
1.26796	jumonji domain containing 7	JMJD7	15	41828084
1.98508	distal membrane arm assembly complex 1	DMAC1	9	-7796490
-2.40938	TNFRSF14 antisense RNA 1	TNFRSF14-AS1	1	-2549919
1.48518	transmembrane protein 8B	TMEM8B	9	35829224
-0.98473	lysophospholipase II pseudogene 1	LYPLA2P1	6	NA
1.00723	OPA3, outer mitochondrial membrane lipid metabolism regulator	OPA3	19	-45527766
1.18217	BRCA1 associated protein	BRAP	12	-111642145
2.009	hydroxysteroid dehydrogenase like 1	HSDL1	16	-84122138
1.61757	mitochondrial ribosomal protein L22	MRPL22	5	154941072
2.25724	tubulin beta pseudogene 5	TUBBP5	9	138150112
-1.38535	zyg-11 family member A, cell cycle regulator	ZYG11A	1	52842510
1.57448	long intergenic non-protein coding RNA 1532	LINC01532	19	29002554
4.80868	ATPase phospholipid transporting 8B4 (putative)	ATP8B4	15	-49858237
-0.932951	olfactory receptor family 1 subfamily F member 1	OR1F1	16	3204246
1.65051	tudor domain containing 7	TDRD7	9	97412019
1.4986	SPT2 chromatin protein domain containing 1	SPTY2D1	11	-18606400
1.26222	zinc finger protein 764	ZNF764	16	-30553763
2.20961	family with sequence similarity 110 member B	FAM110B	8	57994553
1.15912	MAPKAPK5 antisense RNA 1	MAPKAPK5-AS1	12	-111839766
1.76602	ribosomal protein L39 like	RPL39L	3	-187120950
-2.73243	iroquois homeobox 2	IRX2	5	-2746164
-1.58554	trafficking protein particle complex 8	TRAPPC8	18	-31829172
-1.65848	phospholipase A2 receptor 1	PLA2R1	2	-159940748
0.812533	diphthamine biosynthesis 6	DPH6	15	-35520272
2.3897	leucyl-tRNA synthetase 2, mitochondrial	LARS2	3	45388582
0.912204	coiled-coil domain containing 61	CCDC61	19	45995460
1.8731	mitochondrial ribosomal protein L54	MRPL54	19	3762666
1.09946	translocase of inner mitochondrial membrane 50	TIMM50	19	39480411
-1.88615	uncharacterized LOC100506388	LOC100506388	17	331204
1.2891	REX4 homolog, 3'-5' exonuclease	REXO4	9	-133406057
-0.847943	long intergenic non-protein coding RNA 1992	LINC01992	17	-27928923
0.534217	uncharacterized LOC105375902	LOC105375902	8	NA
3.07148	oligodendrocyte transcription factor 1	OLIG1	21	33070143
2.2025	odd-skipped related transciption factor 2	OSR2	8	98944402
1.02719	leucine carboxyl methyltransferase 1 pseudogene	LOC554206	16	25031740
1.36066	ADAMTS like 1	ADAMTSL1	9	18474080
-0.810884	long intergenic non-protein coding RNA 858	LINC00858	10	84279979
-2.78161	RALY RNA binding protein like	RALYL	8	84184665
1.15856	family with sequence similarity 120A opposite strand	FAM120AOS	9	-93446493
1.54573	syntaxin 18	STX18	4	-4418968
1.61702	ArfGAP with RhoGAP domain, ankyrin repeat and PH domain 1	ARAP1	11	-72685068
2.68184	calcium/calmodulin dependent protein kinase ID	CAMK1D	10	12388981
2.04103	long intergenic non-protein coding RNA 865	LINC00865	10	89829492
1.33153	oxysterol binding protein like 2	OSBPL2	20	62238484
1.5388	NADH:ubiquinone oxidoreductase subunit A12	NDUFA12	12	-94971327
-0.924087	protein-L-isoaspartate (D-aspartate) O-methyltransferase domain containing 1	PCMTD1	8	-51817574
1.75079	thimet oligopeptidase 1	THOP1	19	2785459
2.44786	transport and golgi organization 2 homolog	TANGO2	22	20021068
1.77945	inhibitor of growth family member 2	ING2	4	183505049
-1.35101	NME/NM23 family member 9	NME9	3	-138261436
-1.51995	cartilage intermediate layer protein	CILP	15	-65195998
2.5227	ankyrin repeat domain 9	ANKRD9	14	-102503648
1.1235	PDZ domain containing 11	PDZD11	X	-70286360
-0.835616	family with sequence similarity 71 member C	FAM71C	12	99647749
-0.80132	neurotrophic receptor tyrosine kinase 3	NTRK3	15	-87977364
-1.28833	developmental pluripotency associated 2	DPPA2	3	-109293787
-1.16465	Sp3 transcription factor pseudogene	SP3P	13	NA
1.12167	beta-1,4-N-acetyl-galactosaminyltransferase 3	B4GALNT3	12	460376
1.29061	RNA polymerase III subunit D	POLR3D	8	22245105
1.74724	heterogeneous nuclear ribonucleoprotein A0	HNRNPA0	5	-137751383
0.36807	zinc finger protein 674	ZNF674	X	-46497724
0.700032	beaded filament structural protein 2	BFSP2	3	133399994
1.27367	MIRLET7B host gene	MIRLET7BHG	22	46085996
2.05218	transducin like enhancer of split 1	TLE1	9	-81583682
1.26743	chromosome 12 open reading frame 65	C12orf65	12	123233296
1.45088	zinc finger MYND-type containing 19	ZMYND19	9	-137582078
0.614726	RIC1 homolog, RAB6A GEF complex partner 1	RIC1	9	5629118
0.741676	immunity related GTPase Q	IRGQ	19	-43584366
-0.748249	ubiquitin conjugating enzyme E2 N like (gene/pseudogene)	UBE2NL	X	143884070
0.935081	RTF1 homolog, Paf1/RNA polymerase II complex component	RTF1	15	41417103
0.78254	neuralized E3 ubiquitin protein ligase 1	NEURL1	10	103493977
1.67573	mitochondrial ribosomal protein L11	MRPL11	11	-66435074
1.19362	ELAV like RNA binding protein 1	ELAVL1	19	-7958572
2.24638	ST8 alpha-N-acetyl-neuraminide alpha-2,8-sialyltransferase 5	ST8SIA5	18	-46679117
-2.98478	glypican 5	GPC5	13	91398618
-1.55399	SSX family member 3	SSX3	X	-48346427
1.89484	ZBED6 C-terminal like	ZBED6CL	7	150329848
1.13865	zinc finger protein 426	ZNF426	19	-9523223
-1.22156	structural maintenance of chromosomes 6	SMC6	2	-17663811
1.35273	DnaJ heat shock protein family (Hsp40) member C5	DNAJC5	20	63895101
-1.15778	serpin family B member 10	SERPINB10	18	63907989
0.429715	solute carrier family 10 member 4	SLC10A4	4	48483342
-2.84388	metastasis associated lung adenocarcinoma transcript 1 (non-protein coding)	MALAT1	11	65497737
0.83201	ring finger protein 216	RNF216	7	-5620040
2.31165	mitochondrial methionyl-tRNA formyltransferase	MTFMT	15	-65001511
-0.607256	uncharacterized LOC105370943	LOC105370943	15	40906808
1.45595	MICAL like 1	MICALL1	22	37906147
-1.23085	long intergenic non-protein coding RNA 1355	LINC01355	1	-23281308
2.68733	ATP binding cassette subfamily G member 1	ABCG1	21	42219156
2.17781	NADH:ubiquinone oxidoreductase subunit A8	NDUFA8	9	-122144058
-2.70013	NME/NM23 family member 5	NME5	5	-138115171
1.26052	DDB1 and CUL4 associated factor 12 like 2	DCAF12L2	X	-126163498
1.12362	chromosome 19 open reading frame 25	C19orf25	19	-1473200
-0.812246	ADAM metallopeptidase domain 20	ADAM20	14	-70522360
1.23872	ribosomal protein L10 pseudogene 17	RPL10P17	1	NA
-1.38254	phosphatidylinositol-4-phosphate 3-kinase catalytic subunit type 2 alpha	PIK3C2A	11	-17086575
1.82194	acetyl-CoA carboxylase beta	ACACB	12	109139396
-2.74944	D-amino acid oxidase	DAO	12	108880080
1.25155	DEP domain containing 5	DEPDC5	22	31753950
1.53378	phosphatidylinositol glycan anchor biosynthesis class X	PIGX	3	196712373
-3.26081	tetraspanin 12	TSPAN12	7	-120787319
2.12802	LSM7 homolog, U6 small nuclear RNA and mRNA degradation associated	LSM7	19	-2321520
-0.725598	potassium voltage-gated channel subfamily Q member 3	KCNQ3	8	-132120857
-1.12659	CACNA1G antisense RNA 1	CACNA1G-AS1	17	-50556206
-0.458523	small integral membrane protein 21	SMIM21	18	-75409475
-1.1852	junctional cadherin complex regulator	JHY	11	122882527
-0.649432	uncharacterized LOC284240	LOC284240	18	79579281
1.63952	lysyl oxidase like 2	LOXL2	8	-23296896
-2.01979	adducin 3	ADD3	10	109996349
1.49752	G protein subunit gamma 7	GNG7	19	-2511219
1.0614	zinc finger protein 319	ZNF319	16	-57994667
1.75359	mitochondrial ribosomal protein L16	MRPL16	11	-59806134
1.07108	small G protein signaling modulator 3	SGSM3	22	40370561
1.52401	WD repeat domain 24	WDR24	16	-684621
1.41328	SET domain and mariner transposase fusion gene	SETMAR	3	4303303
-0.833578	long intergenic non-protein coding RNA 2044	LINC02044	3	-113142349
0.837615	uncharacterized LOC105373383	LOC105373383	X	153599339
2.59027	PH domain and leucine rich repeat protein phosphatase 1	PHLPP1	18	62715438
4.63846	C-X-C motif chemokine ligand 10	CXCL10	4	-76021115
-3.31356	solute carrier family 23 member 1	SLC23A1	5	-139367195
-1.16478	long intergenic non-protein coding RNA 216	LINC00216	14	58288032
1.21271	C-type lectin domain family 2 member D pseudogene	LOC374443	12	9648046
1.14749	immunoglobulin superfamily member 22	IGSF22	11	-18704304
1.82715	F-box protein 8	FBXO8	4	-174236658
0.832804	zinc finger protein 839	ZNF839	14	102319750
0.913255	multivesicular body subunit 12B	MVB12B	9	126326843
1.61656	zinc finger FYVE-type containing 1	ZFYVE1	14	-72969444
1.91162	myosin X	MYO10	5	-16661906
5.75674	gliomedin	GLDN	15	51341503
-0.929952	glucose-6-phosphatase catalytic subunit 2	G6PC2	2	168901239
0.65782	family with sequence similarity 133 member A	FAM133A	X	93674012
2.19113	UBX domain protein 2A	UBXN2A	2	23940505
-2.85676	solute carrier family 23 member 3	SLC23A3	2	-219161458
1.71403	ATP6V0E2 antisense RNA 1	ATP6V0E2-AS1	7	-149867693
1.65469	oxidative stress responsive serine rich 1	OSER1	20	-44195940
2.42828	ST3 beta-galactoside alpha-2,3-sialyltransferase 6	ST3GAL6	3	98732235
1.68069	N-terminal Xaa-Pro-Lys N-methyltransferase 1	NTMT1	9	129608883
-0.662093	uncharacterized LOC107986251	LOC107986251	4	NA
0.875459	chromosome 18 open reading frame 25	C18orf25	18	46174021
-1.35492	keratin associated protein 4-12	KRTAP4-12	17	-41123090
-1.10303	leucine rich repeat containing 52	LRRC52	1	165544240
2.42189	transmembrane protein 101	TMEM101	17	-44011187
1.15706	NADH:ubiquinone oxidoreductase subunit A2	NDUFA2	5	-140645362
-1.15638	cilia and flagella associated protein 221	CFAP221	2	119544431
5.18715	myosin VIIA and Rab interacting protein	MYRIP	3	39809659
1.24226	NADH:ubiquinone oxidoreductase subunit B11	NDUFB11	X	-47142215
-4.36394	cytochrome P450 family 4 subfamily A member 22	CYP4A22	1	47137424
0.99017	uncharacterized LOC101929122	LOC101929122	6	-159165898
1.92294	forkhead box S1	FOXS1	20	-31844299
-1.04017	uncharacterized LOC101929279	LOC101929279	10	30211851
-1.02576	TATA-box binding protein associated factor, RNA polymerase I subunit B	TAF1B	2	9843441
0.889844	low density lipoprotein receptor class A domain containing 4	LDLRAD4	18	13218729
-0.818167	long intergenic non-protein coding RNA 1516	LINC01516	10	25113057
1.01932	nuclear receptor binding SET domain protein 2	NSD2	4	1871395
2.37824	family with sequence similarity 220 member A	FAM220A	7	-6329408
-1.16846	chondromodulin	CNMD	13	-52703265
0.876402	dual specificity phosphatase 16	DUSP16	12	-12473281
0.878025	ZNF674 antisense RNA 1 (head to head)	ZNF674-AS1	X	46545489
-4.16513	dopa decarboxylase	DDC	7	-50458435
1.4546	uncharacterized LOC100289361	LOC100289361	3	-143000844
1.09067	cleavage and polyadenylation factor I subunit 1	CLP1	11	57657743
3.72811	growth arrest and DNA damage inducible gamma	GADD45G	9	89605011
1.51514	BRISC and BRCA1 A complex member 1	BABAM1	19	17267375
1.45044	peroxisome proliferator activated receptor gamma	PPARG	3	12287849
1.27911	HIG1 hypoxia inducible domain family member 2A	HIGD2A	5	176388525
1.79252	N-terminal asparagine amidase	NTAN1	16	613599
-2.03988	long intergenic non-protein coding RNA 1913	LINC01913	2	41877554
1.29956	uncharacterized LOC100996419	LOC100996419	5	179859002
1.13289	MON1 homolog B, secretory trafficking associated	MON1B	16	77190918
-4.83782	membrane metalloendopeptidase	MME	3	155079646
0.731281	COMM domain containing 4	COMMD4	15	75335995
0.858261	fibronectin type III domain containing 5	FNDC5	1	-32862267
-1.12534	uncharacterized LOC389641	LOC389641	8	23225220
1.22028	AT-rich interaction domain 3A	ARID3A	19	926036
0.922854	erythrocyte membrane protein band 4.1 like 4B	EPB41L4B	9	-109239726
-1.73647	uncharacterized LOC109864269	LOC109864269	4	-112646719
-1.63119	tudor domain containing 6	TDRD6	6	46680267
1.55552	serine/threonine/tyrosine interacting like 1	STYXL1	7	-75996336
-0.852	centrin 1	CETN1	18	580342
-1.12097	long intergenic non-protein coding RNA 1723	LINC01723	20	12950339
-0.588162	nodal growth differentiation factor	NODAL	10	-70431935
-1.0121	long intergenic non-protein coding RNA 2367	LINC02367	12	9367463
1.34699	MIR646 host gene	MIR646HG	20	60138491
1.39366	nudix hydrolase 22	NUDT22	11	64226273
2.34621	parvin beta	PARVB	22	44069116
-0.831785	INO80 complex subunit D	INO80D	2	-205993720
-0.767416	secretoglobin family 2B member 2	SCGB2B2	19	-34590624
1.44869	DNA nucleotidylexotransferase	DNTT	10	96304327
0.786731	dihydrouridine synthase 2	DUS2	16	68022943
-0.853058	BRO1 domain and CAAX motif containing	BROX	1	222712552
-2.77675	neuron derived neurotrophic factor	NDNF	4	-121035626
-0.920102	coiled-coil domain containing 60	CCDC60	12	119334711
2.64642	coproporphyrinogen oxidase	CPOX	3	-98579449
2.31048	CLN8, transmembrane ER and ERGIC protein	CLN8	8	1763703
2.00565	family with sequence similarity 162 member B	FAM162B	6	-116752196
3.18048	catenin alpha 2	CTNNA2	2	79523182
0.963758	RNA binding motif protein 19	RBM19	12	-113822053
-3.88699	family with sequence similarity 151 member A	FAM151A	1	-54609176
-2.09338	PRAME family member 11	PRAMEF11	1	-12824759
-1.96731	interleukin 1 receptor like 1	IL1RL1	2	102311501
1.40474	kelch repeat and BTB domain containing 4	KBTBD4	11	-47572196
1.19159	tRNA methyltransferase 2 homolog B	TRMT2B	X	-101009344
1.47512	tetraspanin 31	TSPAN31	12	57744988
-0.716086	MIER1 transcriptional regulator	MIER1	1	66924894
-1.00447	N-terminal EF-hand calcium binding protein 2	NECAB2	16	83968631
-0.953947	long intergenic non-protein coding RNA 1512	LINC01512	6	43891027
1.43044	mitochondrial ribosomal protein L4	MRPL4	19	10251963
2.22609	TAP binding protein like	TAPBPL	12	6452010
2.61368	LysM domain containing 2	LYSMD2	15	-51723063
1.18103	steroid receptor RNA activator 1	SRA1	5	-140550066
1.80229	tubulin gamma complex associated protein 6	TUBGCP6	22	-50217688
3.71931	fibroblast growth factor 14	FGF14	13	-101720854
-1.08499	uncharacterized LOC101929549	LOC101929549	12	-4700416
2.05818	TBC1 domain family member 2	TBC1D2	9	-98198997
1.12145	chromosome 11 open reading frame 95	C11orf95	11	-63759891
1.61269	OTU deubiquitinase with linear linkage specificity like	OTULINL	5	14581781
1.29729	spalt like transcription factor 4	SALL4	20	-51782716
1.0406	YJU2 splicing factor homolog	YJU2	19	4247069
1.09597	TELO2 interacting protein 2	TTI2	8	-33498464
2.33269	PPFIA binding protein 2	PPFIBP2	11	7597185
-3.18292	pipecolic acid and sarcosine oxidase	PIPOX	17	29042899
2.4504	UTP20, small subunit processome component	UTP20	12	101280126
2.15236	alkaline ceramidase 2	ACER2	9	19408926
1.28003	transmembrane protein 33	TMEM33	4	41935119
1.07098	HAUS augmin like complex subunit 8	HAUS8	19	-17049760
1.21329	chromosome 19 open reading frame 81	C19orf81	19	50649444
1.17496	POU class 6 homeobox 1	POU6F1	12	-51201683
2.23476	transmembrane protein 159	TMEM159	16	21158376
-0.740436	long intergenic non-protein coding RNA 1231	LINC01231	9	3181588
-0.792944	nudix hydrolase 11	NUDT11	X	-51490010
1.05174	leucine rich repeat containing 14	LRRC14	8	144517964
1.35917	TP53 regulating kinase	TP53RK	20	-46684364
0.887728	patched 1	PTCH1	9	-95442979
1.18087	peptidase, mitochondrial processing beta subunit	PMPCB	7	103297425
1.54392	NADH:ubiquinone oxidoreductase subunit A6	NDUFA6	22	-7870
1.44694	alkB homolog 3, alpha-ketoglutaratedependent dioxygenase	ALKBH3	11	43880806
-0.827444	glycine receptor alpha 2	GLRA2	X	14529297
2.38469	aurora kinase A	AURKA	20	-56369388
1.23166	carnitine palmitoyltransferase 1A	CPT1A	11	-68754882
-1.7687	ubiquitin specific peptidase 16	USP16	21	29024616
1.22161	peptidylprolyl cis/trans isomerase, NIMA-interacting 4	PIN4	X	72181675
1.07751	stathmin 1	STMN1	1	-25900115
0.680575	proteasome inhibitor subunit 1	PSMF1	20	1113228
1.80092	uncharacterized LOC107984659	LOC107984659	14	NA
3.63126	leucine rich repeat and fibronectin type III domain containing 5	LRFN5	14	41606855
-0.810319	synaptotagmin 4	SYT4	18	-43267891
-1.06015	DPEP2 neighbor	DPEP2NB	16	-68013435
-6.48748	myo-inositol oxygenase	MIOX	22	50486783
-1.33443	kinesin family member C3	KIFC3	16	-57758216
1.83684	GADD45G interacting protein 1	GADD45GIP1	19	-12954155
-3.63318	fibulin 5	FBLN5	14	-91869410
-0.565058	uncharacterized LOC401442	LOC401442	8	738547
0.744252	HKR1, GLI-Kruppel zinc finger family member	HKR1	19	37334623
1.97319	McKusick-Kaufman syndrome	MKKS	20	-10404779
0.721458	rabenosyn, RAB effector	RBSN	3	-15095670
-0.450991	zinc finger protein 215	ZNF215	11	6926360
1.1512	MTSS1, I-BAR domain containing	MTSS1	8	-124550769
1.13941	chromosome 19 open reading frame 53	C19orf53	19	13774442
-0.612375	eukaryotic translation initiation factor 3 subunit J pseudogene	LOC100422212	1	-163421069
0.847013	zinc finger protein 576	ZNF576	19	43596391
-1.05604	echinoderm microtubule associated protein like 6	EML6	2	54725011
-0.969487	G protein-coupled receptor 158	GPR158	10	25175360
1.56788	ubiquitin conjugating enzyme E2 M	UBE2M	19	-58555711
1.57095	methylmalonic aciduria (cobalamin deficiency) cblC type, with homocystinuria	MMACHC	1	45500183
1.59523	major histocompatibility complex, class I-related	MR1	1	181033424
1.5847	zinc finger protein 34	ZNF34	8	-144772223
2.13175	zinc finger protein 429	ZNF429	19	21505551
1.27766	transmembrane protein adipocyte associated 1	TPRA1	3	-127571231
1.50445	stannin	SNN	16	11668432
0.800655	long intergenic non-protein coding RNA 1224	LINC01224	19	-23399235
1.45936	PRELI domain containing 1	PRELID1	5	177303761
1.41284	coiled-coil domain containing 124	CCDC124	19	17935095
0.933504	G protein subunit beta 1 like	GNB1L	22	-19788410
1.34853	transmembrane protein 230	TMEM230	20	-5099837
1.64265	NADH:ubiquinone oxidoreductase core subunit S7	NDUFS7	19	1383883
1.45736	chromatin accessibility complex 1	CHRAC1	8	140511981
0.883322	required for meiotic nuclear division 5 homolog B	RMND5B	5	178130960
2.69109	glucosamine-phosphate N-acetyltransferase 1	GNPNAT1	14	-52775192
1.89567	siah E3 ubiquitin protein ligase 2	SIAH2	3	-150741122
0.88479	solute carrier family 6 member 7	SLC6A7	5	150189860
1.52335	Cbl proto-oncogene like 1	CBLL1	7	107743696
-0.953437	keratin associated protein 19-3	KRTAP19-3	21	-30491463
1.70689	chromosome 8 open reading frame 33	C8orf33	8	145052437
1.93059	testis expressed metallothionein like protein	TESMIN	11	-68736131
2.38788	coiled-coil domain containing 9B	CCDC9B	15	-40331451
-0.84821	uncharacterized LOC105370629	LOC105370629	14	NA
2.01158	centromere protein H	CENPH	5	69189547
-1.73561	testis development related 1	TDRG1	6	40378336
-1.56944	uncharacterized LOC100506473	LOC100506473	2	NA
-0.52197	long intergenic non-protein coding RNA 326	LINC00326	6	133088079
1.35048	high mobility group box 3	HMGB3	X	150980507
-1.48306	C1q and TNF related 12	C1QTNF12	1	-1242445
0.98318	torsin family 2 member A	TOR2A	9	-127731523
1.32793	vitelline membrane outer layer 1 homolog	VMO1	17	-4785284
-1.10957	lens intrinsic membrane protein 2	LIM2	19	-51379908
0.583487	protein O-fucosyltransferase 1	POFUT1	20	32207892
-0.635679	cystatin 8	CST8	20	23491100
1.10728	limb development membrane protein 1	LMBR1	7	-156680875
-0.798382	POM121 transmembrane nucleoporin like 12	POM121L12	7	53035655
0.953274	thioredoxin domain containing 11	TXNDC11	16	-11679079
1.20288	CCR4-NOT transcription complex subunit 10	CNOT10	3	32685144
-0.575106	gamma-aminobutyric acid type A receptor beta2 subunit	GABRB2	5	-161288428
0.757062	ER membrane protein complex subunit 1	EMC1	1	-19215663
2.5422	nucleoporin 37	NUP37	12	-102074188
0.785052	cholinergic receptor nicotinic beta 4 subunit	CHRNB4	15	-78624110
-0.886847	potassium channel tetramerization domain containing 17	KCTD17	22	37051735
-1.73765	ethylmalonyl-CoA decarboxylase 1	ECHDC1	6	-127288711
-0.75351	dopamine receptor D1	DRD1	5	-175440037
-2.77046	FERM domain containing 4B	FRMD4B	3	-69168782
1.48946	uncharacterized LOC102723665	LOC102723665	10	-96830631
-1.09734	keratin 82	KRT82	12	-52393950
1.50388	NSE3 homolog, SMC5-SMC6 complex component	NSMCE3	15	-29268148
1.16315	protein tyrosine phosphatase, mitochondrial 1	PTPMT1	11	47565429
1.51614	small nuclear ribonucleoprotein D2 polypeptide	SNRPD2	19	-45687453
0.98235	suppressor APC domain containing 2	SAPCD2	9	-137062126
1.44744	coatomer protein complex subunit epsilon	COPE	19	-18899513
2.09663	neuroligin 4, X-linked	NLGN4X	X	-5890025
1.40064	2-oxoglutarate and iron dependent oxygenase domain containing 1	OGFOD1	16	56452083
1.33525	THAP domain containing 7	THAP7	22	-20999771
1.23182	WD repeat domain 70	WDR70	5	37379259
-0.538342	coiled-coil domain containing 7	CCDC7	10	32446081
0.843924	breast cancer metastasis suppressor 1	BRMS1	11	-66337332
1.30704	apoptogenic 1, mitochondrial	APOPT1	14	103562956
1.67906	katanin catalytic subunit A1 like 2	KATNAL2	18	46946796
1.01122	ubiquitin like 7	UBL7	15	-74445976
0.76422	tenascin N	TNN	1	175067857
-1.44032	synapse differentiation inducing 1	SYNDIG1	20	24469805
-1.49879	neuropeptide Y receptor Y5	NPY5R	4	163344101
-1.4213	chromodomain helicase DNA binding protein 9	CHD9	16	53155925
-0.672966	coiled-coil domain containing 87	CCDC87	11	-66590168
1.25073	Rho guanine nucleotide exchange factor 37	ARHGEF37	5	149581571
-4.92824	microsomal glutathione S-transferase 1	MGST1	12	16347642
1.81636	transformation/transcription domain associated protein	TRRAP	7	98878489
-1.03249	BCL2 associated transcription factor 1	BCLAF1	6	-136256862
-2.21852	family with sequence similarity 184 member A	FAM184A	6	-118959828
1.17027	BCL2 associated agonist of cell death	BAD	11	-64269827
-2.51681	guanylate cyclase 1 soluble subunit alpha 1	GUCY1A1	4	155666709
1.43403	DNA polymerase delta 4, accessory subunit	POLD4	11	-67350764
-0.545528	MAGE family member C1	MAGEC1	X	141903855
1.54153	protein tyrosine phosphatase, receptor type J	PTPRJ	11	47980557
-3.4982	solute carrier family 22 member 12	SLC22A12	11	64590809
0.746274	uridine monophosphate synthetase	UMPS	3	124730365
-1.41575	pyridine nucleotide-disulphide oxidoreductase domain 2	PYROXD2	10	-98383564
2.49455	PET117 homolog	PET117	20	18137854
1.26834	PLAG1 like zinc finger 2	PLAGL2	20	-32192503
1.0408	metallophosphoesterase 1	MPPE1	18	-11883470
-1.22753	peptidase domain containing associated with muscle regeneration 1	PAMR1	11	-35431828
1.57644	NME/NM23 nucleoside diphosphate kinase 6	NME6	3	-48292316
1.39245	uncharacterized LOC105372707	LOC105372707	20	NA
-0.442837	stomatin like 3	STOML3	13	-38965924
-1.34346	SH3 domain containing GRB2 like 3, endophilin A3	SH3GL3	15	83447227
0.925067	GINS complex subunit 4	GINS4	8	41529205
0.628692	RAN binding protein 3	RANBP3	19	-5916140
0.919938	TOX high mobility group box family member 4	TOX4	14	21477175
-1.15435	uncharacterized LOC105369595	LOC105369595	12	-585698
-1.52235	sulfotransferase family 1B member 1	SULT1B1	4	-69726967
0.979565	retinoic acid receptor beta	RARB	3	25340801
-1.41048	TONSL antisense RNA 1	TONSL-AS1	8	144435167
1.55058	TCF3 fusion partner	TFPT	19	-81432
-1.04698	FAM160A1 divergent transcript	FAM160A1-DT	4	NA
0.99922	distal membrane arm assembly complex 2	DMAC2	19	-41431317
0.652714	small nuclear ribonucleoprotein U11/U12 subunit 35	SNRNP35	12	123458103
1.67203	LEF1 antisense RNA 1	LEF1-AS1	4	108172119
-0.742584	synapsin III	SYN3	22	-32512552
-1.66639	structural maintenance of chromosomes 3	SMC3	10	110567690
-0.949483	indoleamine 2,3-dioxygenase 2	IDO2	8	39934954
1.80108	translocase of inner mitochondrial membrane 10	TIMM10	11	-57528462
-2.6455	galactosidase beta 1 like 2	GLB1L2	11	134331873
1.41255	receptor accessory protein 4	REEP4	8	-22138013
-0.64926	uncharacterized LOC145783	LOC145783	15	-56886169
0.556814	peroxisomal biogenesis factor 16	PEX16	11	-45909668
2.18327	dopey family member 2	DOPEY2	21	36164540
0.651593	cleavage stimulation factor subunit 2	CSTF2	X	100820362
2.5151	PX domain containing serine/threonine kinase like	PXK	3	58332889
-1.31369	butyrophilin like 8	BTNL8	5	180899076
-3.01423	nitric oxide synthase trafficking	NOSTRIN	2	1109
1.57146	abhydrolase domain containing 12	ABHD12	20	-25294742
1.72349	arginine vasopressin receptor 1A	AVPR1A	12	-63142758
-0.932597	uncharacterized LOC107984399	LOC107984399	11	NA
5.06799	parvalbumin	PVALB	22	-36800700
1.24409	ubiquitin specific peptidase 30	USP30	12	109023088
-1.46355	UBX domain protein 4	UBXN4	2	135741618
-0.86984	RNA, 7SL, cytoplasmic 832, pseudogene	RN7SL832P	2	10690009
0.784883	zinc finger protein 341	ZNF341	20	33731759
2.18699	hydroxyacylglutathione hydrolase like	HAGHL	16	726935
0.997533	leucine rich repeat and sterile alpha motif containing 1	LRSAM1	9	127451485
1.48807	Purkinje cell protein 2	PCP2	19	-7631614
-1.63071	lipoprotein(a) like 2, pseudogene	LPAL2	6	-160466554
2.77326	tetraspanin 7	TSPAN7	X	38561477
1.28764	NADH:ubiquinone oxidoreductase complex assembly factor 5	NDUFAF5	20	13785025
1.24596	DNA topoisomerase III beta	TOP3B	22	-21957024
-0.881671	sterile alpha motif domain containing 15	SAMD15	14	77377377
0.945744	RNA binding motif protein 15B	RBM15B	3	51391267
-1.03444	TANK binding kinase 1	TBK1	12	64452059
-0.698705	uncharacterized LOC102723809	LOC102723809	14	-64514150
1.15719	DnaJ heat shock protein family (Hsp40) member C4	DNAJC4	11	64230280
-0.493528	von Willebrand factor A domain containing 3B	VWA3B	2	98149494
-3.86931	solute carrier family 22 member 6	SLC22A6	11	-62976596
-1.23441	protein kinase C and casein kinase substrate in neurons 3	PACSIN3	11	-47177521
-3.02389	STEAP2 metalloreductase	STEAP2	7	90213819
1.14539	tetraspanin 11	TSPAN11	12	30926903
-1.14561	uncharacterized LOC101928858	LOC101928858	5	67793212
-0.430742	forkhead box E3	FOXE3	1	47416071
-0.850974	uncharacterized LOC102724511	LOC102724511	6	170160641
-2.12556	frizzled related protein	FRZB	2	-182833275
-0.773078	suppressor of IKBKE 1	SIKE1	1	-114769483
0.999763	testis expressed 41 (non-protein coding)	TEX41	2	144667966
-1.87229	transmembrane protein 207	TMEM207	3	-190428655
0.84223	kelch domain containing 4	KLHDC4	16	-87707811
-4.60733	solute carrier family 22 member 2	SLC22A2	6	-160216761
2.95321	ATPase H+ transporting V0 subunit a4	ATP6V0A4	7	-138706293
1.66667	cyclin dependent kinase 2 interacting protein	CINP	14	-102348281
1.1059	NSE2 (MMS21) homolog, SMC5-SMC6 complex SUMO ligase	NSMCE2	8	125091822
1.07024	solute carrier family 35 member E1	SLC35E1	19	-16549836
-0.64562	long intergenic non-protein coding RNA 2458	LINC02458	12	-89011125
-0.604225	uncharacterized LOC284395	LOC284395	19	-29287010
1.1572	kelch like family member 22	KLHL22	22	-20441518
-1.48141	family with sequence similarity 107 member A	FAM107A	3	-58564111
1.34626	biogenesis of lysosomal organelles complex 1 subunit 4	BLOC1S4	4	6716114
2.34555	uncharacterized LOC107984316	LOC107984316	11	NA
0.99147	ribosomal RNA processing 7 homolog A	RRP7A	22	-42508334
-0.513532	uncharacterized LOC101928961	LOC101928961	10	-66894109
2.45232	SH3 domain and tetratricopeptide repeats 1	SH3TC1	4	8199243
1.15317	HOXA cluster antisense RNA 3	HOXA-AS3	7	27147162
3.14344	cochlin	COCH	14	30874534
-0.607539	ankyrin repeat domain 23	ANKRD23	2	-96837913
1.45298	vesicle transport through interaction with t-SNAREs 1B	VTI1B	14	-67651149
0.929439	inhibitor of growth family member 4	ING4	12	-6650537
1.15388	mediator complex subunit 22	MED22	9	-133340900
-1.09564	FGFR1 oncogene partner 2	FGFR1OP2	12	26938371
2.54713	lin-7 homolog A, crumbs cell polarity complex component	LIN7A	12	-80792520
0.992872	minichromosome maintenance complex component 4	MCM4	8	47960202
0.654332	cystatin 9	CST9	20	-23602409
0.980247	zinc finger protein 263	ZNF263	16	3283486
-0.647474	glycoprotein V platelet	GP5	3	-194394820
1.76346	cytochrome c oxidase subunit 7C	COX7C	5	86617966
1.4513	zinc finger protein 564	ZNF564	19	-12525369
-1.17033	sodium/potassium transporting ATPase interacting 3	NKAIN3	8	62248941
1.13157	mitogen-activated protein kinase kinase 5	MAP2K5	15	67549003
-0.703881	uncharacterized LOC100506406	LOC100506406	5	35938800
-1.31569	IZUMO family member 2	IZUMO2	19	-50152547
1.55001	potassium voltage-gated channel subfamily J member 11	KCNJ11	11	-17385248
-4.21588	cytochrome P450 family 4 subfamily A member 11	CYP4A11	1	-46929173
-0.937529	DnaJ heat shock protein family (Hsp40) member C5 gamma	DNAJC5G	2	27275420
-1.02208	long intergenic non-protein coding RNA 1069	LINC01069	13	-77979765
-1.20669	transforming growth factor alpha	TGFA	2	-70447279
-0.837541	keratin associated protein 7-1 (gene/pseudogene)	KRTAP7-1	21	-30829039
-2.89441	unc-5 family C-terminal like	UNC5CL	6	-41026900
-0.868603	uncharacterized LOC101927253	LOC101927253	17	NA
-0.761608	uncharacterized LOC101060553	LOC101060553	13	-111148196
0.73447	zinc finger and BTB domain containing 3	ZBTB3	11	-62750962
1.20038	cell division cycle associated 5	CDCA5	11	-65077454
2.31032	neuregulin 2	NRG2	5	-139846778
0.852212	POP4 homolog, ribonuclease P/MRP subunit	POP4	19	29606262
1.16849	DEAD-box helicase 51	DDX51	12	-132136594
-0.531011	uncharacterized LOC145845	LOC145845	15	-36864442
3.85103	uncharacterized LOC646903	LOC646903	3	149971278
2.03567	sushi domain containing 1	SUSD1	9	-112040780
-1.1394	mediator complex subunit 13	MED13	17	-61942604
1.81073	SLC25A25 antisense RNA 1	SLC25A25-AS1	9	-128111170
-4.74224	metallothionein 1G	MT1G	16	-56666734
1.08964	zw10 kinetochore protein	ZW10	11	-113733182
-1.07571	histone cluster 1 H4 family member f	HIST1H4F	6	26240425
-0.800693	tyrosine 3-monooxygenase/tryptophan 5-monooxygenase activation protein epsilon pseudogene 7	YWHAEP7	17	-37842948
-3.00159	hydroxyacid oxidase 2	HAO2	1	119368775
-0.693589	PRAME family member 12	PRAMEF12	1	12774847
1.0767	ribonuclease H2 subunit A	RNASEH2A	19	12806613
-1.07038	gap junction protein alpha 5	GJA5	1	-147756198
-0.977361	ZFP37 zinc finger protein	ZFP37	9	-113041814
0.92204	autophagy and beclin 1 regulator 1	AMBRA1	11	-46396411
0.953738	cyclin dependent kinase inhibitor 2A	CDKN2A	9	-21967751
-1.27482	M-phase phosphoprotein 10	MPHOSPH10	2	71130313
2.87926	ILF3 divergent tranacript	ILF3-DT	19	-10651861
-0.790858	long intergenic non-protein coding RNA 525	LINC00525	7	47761475
1.20349	YY1 associated factor 2	YAF2	12	-42157104
-0.910277	uncharacterized LOC101928937	LOC101928937	12	99093358
0.625764	alkB homolog 1, histone H2A dioxygenase	ALKBH1	14	-77672405
1.16028	ankyrin repeat and SOCS box containing 8	ASB8	12	-48147787
-1.92253	vacuolar protein sorting 13 homolog A	VPS13A	9	77177444
0.899567	CHKB divergent transcript	CHKB-DT	22	50583025
2.09845	centromere protein W	CENPW	6	126339788
0.94801	chromosome 1 open reading frame 112	C1orf112	1	169795408
-1.20524	olfactory receptor family 7 subfamily A member 5	OR7A5	19	-14826326
-1.49171	uncharacterized LOC101929667	LOC101929667	2	NA
1.19746	breast carcinoma amplified sequence 4	BCAS4	20	50794893
4.53791	early B cell factor 2	EBF2	8	-25841729
1.94729	phosphatidylinositol glycan anchor biosynthesis class A	PIGA	X	-15319450
-1.07276	WD repeat domain 35	WDR35	2	-19910265
0.983601	anaphase promoting complex subunit 10	ANAPC10	4	-144994574
1.35929	methyltransferase like 22	METTL22	16	8621639
0.943067	UBX domain protein 2B	UBXN2B	8	58411263
0.692438	ubiquitin protein ligase E3B	UBE3B	12	109477622
0.88625	solute carrier family 24 member 1	SLC24A1	15	65621931
-0.592909	chromosome 7 open reading frame 71	C7orf71	7	26637870
-0.554766	ring finger protein 6	RNF6	13	-26132114
0.744051	tRNA methyltransferase O	TRMO	9	-97904488
-1.4688	regenerating family member 3 gamma	REG3G	2	79025685
-0.868675	sushi, nidogen and EGF like domains 1	SNED1	2	240998837
0.887851	ectopic P-granules autophagy protein 5 homolog	EPG5	18	-45847608
1.15754	discs large MAGUK scaffold protein 3	DLG3	X	70444854
-0.822996	olfactory receptor family 52 subfamily D member 1	OR52D1	11	5488684
1.21646	HD domain containing 3	HDDC3	15	-90930917
1.97999	DNL-type zinc finger	DNLZ	9	-136361899
-1.41954	inter-alpha-trypsin inhibitor heavy chain 2	ITIH2	10	7703272
-2.54003	solute carrier family 6 member 19	SLC6A19	5	1201594
1.56919	translocase of outer mitochondrial membrane 22	TOMM22	22	38681948
1.23153	mitochondrial antiviral signaling protein	MAVS	20	3846798
1.42418	HOXA10 antisense RNA	HOXA10-AS	7	27168898
1.54169	G-rich RNA sequence binding factor 1	GRSF1	4	-70815781
-0.55179	regulator of G protein signaling like 1	RGSL1	1	182450120
-0.605495	long intergenic non-protein coding RNA 1243	LINC01243	9	-31371610
-0.774467	WD repeat domain 31	WDR31	9	-113313221
0.967044	uncharacterized LOC101927974	LOC101927974	7	-107742752
1.45759	uncharacterized LOC107986282	LOC107986282	4	NA
1.52204	LETM1 domain containing 1	LETMD1	12	51048298
-0.907217	uncharacterized LOC283856	LOC283856	16	-56092986
1.22742	NAD(P) dependent steroid dehydrogenase-like	NSDHL	X	152830966
1.60755	damage specific DNA binding protein 2	DDB2	11	47214941
1.77312	F-box protein 33	FBXO33	14	-39396372
-0.946612	long intergenic non-protein coding RNA 2380	LINC02380	4	57425871
-0.663464	MIR2052 host gene	MIR2052HG	8	74599865
0.867166	zinc finger protein 414	ZNF414	19	-8511331
-0.760694	leucine rich repeat containing 55	LRRC55	11	57181746
3.79659	secreted frizzled related protein 4	SFRP4	7	-37905932
-0.652431	leucine rich repeat, Ig-like and transmembrane domains 1	LRIT1	10	-84231519
-0.545728	myozenin 2	MYOZ2	4	119135783
1.03996	zinc finger protein like 1	ZFPL1	11	65084221
-2.20905	caldesmon 1	CALD1	7	134779412
-2.949	cytochrome P450 family 8 subfamily B member 1	CYP8B1	3	-42872191
-1.32203	peptidoglycan recognition protein 4	PGLYRP4	1	-153330120
0.974882	ubiquitin specific peptidase 7	USP7	16	-8892093
0.7143	protocadherin 19	PCDH19	X	-100291643
-2.71398	solute carrier family 13 member 3	SLC13A3	20	-46557822
-1.39169	microtubule associated protein 9	MAP9	4	-155342659
2.59617	glycogenin 1	GYG1	3	148991407
1.79263	G protein-coupled receptor 146	GPR146	7	1044572
-1.34519	SUMO specific peptidase 6	SENP6	6	75601508
-1.83257	RNA binding region (RNP1, RRM) containing 3	RNPC3	1	103525955
0.987231	death inducer-obliterator 1	DIDO1	20	-62877737
1.86443	adenosine deaminase, tRNA specific 1	ADAT1	16	-75596878
-1.46026	chromosome 19 open reading frame 84	C19orf84	19	-51388288
1.00605	transmembrane and coiled-coil domains 4	TMCO4	1	-19682212
2.82269	collagen type XI alpha 1 chain	COL11A1	1	-102876466
1.14351	solute carrier family 2 member 8	SLC2A8	9	127397137
2.44777	translation initiation factor IF-2	LOC101060400	17	NA
1.19937	zinc and ring finger 1	ZNRF1	16	74999016
1.31351	DEAD-box helicase 28	DDX28	16	-68021273
-1.32506	small proline rich protein 2A	SPRR2A	1	-153056119
-1.45736	family with sequence similarity 126 member B	FAM126B	2	-200973717
1.6758	ubiquitously expressed prefoldin like chaperone	UXT	X	-47651791
0.615484	GTP binding protein 3, mitochondrial	GTPBP3	19	17337516
-0.990749	GABRG3 antisense RNA 1	GABRG3-AS1	15	-27157734
0.892324	centromere protein L	CENPL	1	-173799549
1.72999	family with sequence similarity 174 member A	FAM174A	5	100535304
1.75219	deoxyribonuclease 2, lysosomal	DNASE2	19	-12875210
-0.903546	epididymal protein pseudogene	LOC338963	15	-82710470
-3.07239	adenylate kinase 4	AK4	1	65149002
-1.00144	uncharacterized LOC149373	LOC149373	1	-231184098
-0.461826	glutamate decarboxylase 2	GAD2	10	26216306
0.829459	beta-1,4-galactosyltransferase 7	B4GALT7	5	177600117
1.3932	nucleotide binding protein like	NUBPL	14	31561384
1.4671	mitochondrial ribosomal protein L41	MRPL41	9	137551856
1.37605	mediator complex subunit 10	MED10	5	-6371925
-1.14504	uncharacterized LOC643072	LOC643072	2	159615293
-0.817847	solute carrier organic anion transporter family member 1C1	SLCO1C1	12	20695354
-2.58774	ras homolog family member B	RHOB	2	20447070
4.493	chromosome 7 open reading frame 57	C7orf57	7	48035510
0.97054	aph-1 homolog B, gamma-secretase subunit	APH1B	15	63277549
-0.989956	cyclin dependent kinase 19	CDK19	6	-110609977
-0.942111	ATP/GTP binding protein 1	AGTPBP1	9	-85546538
0.91458	LAS1 like, ribosome biogenesis factor	LAS1L	X	-65512581
0.683735	ess-2 splicing factor homolog	ESS2	22	-19130278
2.6014	chromosome 1 open reading frame 53	C1orf53	1	197902551
1.14628	phenylalanyl-tRNA synthetase alpha subunit	FARSA	19	-12922469
2.81789	3-hydroxyacyl-CoA dehydratase 4	HACD4	9	-21003623
-1.27677	ectonucleotide pyrophosphatase/phosphodiesterase 7	ENPP7	17	79731102
-2.12729	DAB2, clathrin adaptor protein	DAB2	5	-39371673
0.986302	inositol-tetrakisphosphate 1-kinase	ITPK1	14	-92939722
-4.83984	fatty acid binding protein 1	FABP1	2	-88122988
1.5431	G-patch domain containing 1	GPATCH1	19	33080879
-3.18831	USH1 protein network component harmonin	USH1C	11	-17493894
1.17157	tetratricopeptide repeat domain 1	TTC1	5	160009099
-0.514504	WAP four-disulfide core domain 9	WFDC9	20	-45607938
1.0137	GRAM domain containing 4	GRAMD4	22	46620401
4.26616	cytohesin 1 interacting protein	CYTIP	2	-157414618
-0.697724	protocadherin gamma subfamily B, 6	PCDHGB6	5	141408202
2.42583	V-set and immunoglobulin domain containing 2	VSIG2	11	-124747471
0.976831	inositol monophosphatase domain containing 1	IMPAD1	8	-56957928
-1.04138	methyltransferase like 21E, pseudogene	METTL21EP	13	102880098
1.2718	long intergenic non-protein coding RNA 1213	LINC01213	3	150238699
2.57178	Ras association domain family member 10	RASSF10	11	13009422
1.0154	ZHX1-C8orf76 readthrough	ZHX1-C8orf76	8	-123226188
-1.14241	TEA domain transcription factor 3	TEAD3	6	-35473596
-0.941183	uncharacterized LOC101929464	LOC101929464	1	33350351
2.22058	transcription factor like 5	TCFL5	20	-62851493
2.84912	family with sequence similarity 13 member C	FAM13C	10	-59246128
1.21357	peptidase, mitochondrial processing alpha subunit	PMPCA	9	136410572
0.851431	small nuclear ribonucleoprotein 13	SNU13	22	-41673932
-5.45499	dihydropyrimidinase	DPYS	8	-104379423
1.47351	growth arrest specific 2 like 1	GAS2L1	22	29306994
-0.701526	olfactory receptor family 1 subfamily Q member 1	OR1Q1	9	122614737
-1.0673	alpha tubulin acetyltransferase 1	ATAT1	6	2106609
1.11059	parvin gamma	PARVG	22	44180889
1.1506	Cdk5 and Abl enzyme substrate 2	CABLES2	20	-62388629
0.808211	nuclear apoptosis inducing factor 1	NAIF1	9	-128061232
-0.571295	trace amine associated receptor 8	TAAR8	6	132552683
1.31248	dorsal inhibitory axon guidance protein	DRAXIN	1	11691723
-1.46233	PDZ domain containing 3	PDZD3	11	119185456
1.60158	MRT4 homolog, ribosome maturation factor	MRTO4	1	19251580
0.75875	cyclin dependent kinase 9	CDK9	9	127786025
-1.66368	LUC7 like 3 pre-mRNA splicing factor	LUC7L3	17	50719543
-0.960936	sorting nexin family member 27	SNX27	1	151612185
-1.0291	patatin like phospholipase domain containing 2	PNPLA2	11	818900
0.918815	scavenger receptor class F member 1	SCARF1	17	-1633857
-0.418057	neurexin 1	NRXN1	2	-49918504
-0.803407	uncharacterized LOC100128239	LOC100128239	11	134032271
1.39644	tyrosine kinase 2	TYK2	19	-10350527
1.29948	nucleoporin 155	NUP155	5	-37291632
0.891441	family with sequence similarity 192 member A	FAM192A	16	-57152465
-0.986564	zinc finger imprinted 2	ZIM2	19	-56774555
-0.934634	long intergenic non-protein coding RNA 1049	LINC01049	13	90493287
-0.870547	solute carrier family 8 member A2	SLC8A2	19	-47428021
2.32969	neurexin 3	NRXN3	14	78170372
1.94462	ubiquitin protein ligase E3 component n-recognin 7 (putative)	UBR7	14	93207055
-2.48478	ketohexokinase	KHK	2	27086742
-0.772201	C-C motif chemokine ligand 22	CCL22	16	57358782
0.791056	unconventional SNARE in the ER 1	USE1	19	17215345
-0.913522	NAV2 antisense RNA 4	NAV2-AS4	11	-19510892
0.868296	KDM7A divergent transcript	KDM7A-DT	7	140177260
-0.725934	cathepsin E	CTSE	1	-206009263
1.50975	makorin ring finger protein 1	MKRN1	7	-140453039
1.09131	OSER1 divergent transcript	OSER1-DT	20	44210959
-1.87144	Sjogren syndrome antigen B	SSB	2	169798811
1.18329	flap structure-specific endonuclease 1	FEN1	11	61792636
1.2612	transmembrane protein 186	TMEM186	16	-8795179
-4.82587	aminocarboxymuconate semialdehyde decarboxylase	ACMSD	2	134838615
1.83885	nei like DNA glycosylase 2	NEIL2	8	11769624
-1.44405	mannosyl (alpha-1,3-)-glycoprotein beta-1,4-N-acetylglucosaminyltransferase, isozyme A	MGAT4A	2	-98619105
-0.992475	keratin associated protein 4-6	KRTAP4-6	17	-41139432
0.625079	LKAAEAR motif containing 1	LKAAEAR1	20	-64083379
-2.23437	proline dehydrogenase 2	PRODH2	19	-35799989
1.24258	ZNF582 antisense RNA 1 (head to head)	ZNF582-AS1	19	56393675
-1.66528	mitochondrial calcium uptake 2	MICU2	13	-21492688
1.73005	uronyl 2-sulfotransferase	UST	6	148747134
1.14612	snurportin 1	SNUPN	15	-75598082
1.89927	cytidine deaminase	CDA	1	20588950
0.364593	lactase like	LCTL	15	-66547467
1.17493	mitochondrial ribosomal protein L17	MRPL17	11	-6680384
0.703855	uncharacterized LOC105369147	LOC105369147	8	-103266444
-4.84925	glucosylceramidase beta 3 (gene/pseudogene)	GBA3	4	22692913
1.33156	cryptochrome circadian regulator 2	CRY2	11	45847117
1.28051	ubiquitin recognition factor in ER associated degradation 1	UFD1	22	-19449940
1.3951	mitochondrial assembly of ribosomal large subunit 1	MALSU1	7	23299320
0.935662	mitochondrial ribosomal protein L23	MRPL23	11	2584
2.24212	adrenoceptor beta 1	ADRB1	10	114044046
-1.16559	translocated promoter region, nuclear basket protein	TPR	1	-186311653
-3.64037	FRAS1 related extracellular matrix protein 2	FREM2	13	38687035
-3.56392	tubulointerstitial nephritis antigen	TINAG	6	54308404
-3.23992	aldehyde dehydrogenase 4 family member A1	ALDH4A1	1	-18871429
-1.65957	zinc finger CCCH-type containing 15	ZC3H15	2	186486157
2.78654	cholinergic receptor muscarinic 1	CHRM1	11	-62908678
-2.71692	fibroblast growth factor receptor 3	FGFR3	4	1793311
-1.02397	APC membrane recruitment protein 1	AMER1	X	-64185116
-0.51915	zinc finger protein 37A	ZNF37A	10	38094335
0.701504	nucleolar protein 12	NOL12	22	37686336
-1.45834	chromosome 10 open reading frame 25	C10orf25	10	-44993931
0.97336	ubiquitin like 4A	UBL4A	X	-154483716
-1.5764	pregnancy specific beta-1-glycoprotein 2	PSG2	19	-43064209
1.08882	EF-hand calcium binding domain 8	EFCAB8	20	32858922
-3.83297	succinate receptor 1	SUCNR1	3	151873642
-1.6231	semaphorin 3G	SEMA3G	3	-52433034
-1.46724	RERG like	RERGL	12	-18080868
0.810835	FK506 binding protein 15	FKBP15	9	-113165519
2.08409	RP9, pre-mRNA splicing factor	RP9	7	-33094797
-0.697053	RNA binding motif protein, Y-linked, family 1, member A1 pseudogene	LOC100652931	Y	22316677
-1.53036	F-box and leucine rich repeat protein 3	FBXL3	13	-77005253
-0.855276	olfactory receptor family 51 subfamily B member 6	OR51B6	11	5351507
0.719729	GLE1, RNA export mediator	GLE1	9	128504691
-3.91501	X-prolyl aminopeptidase 2	XPNPEP2	X	129738969
1.42797	required for excision 1-B domain containing	REX1BD	19	18588684
-1.4553	claudin 19	CLDN19	1	-42733092
0.961405	TNF receptor superfamily member 4	TNFRSF4	1	-1211325
2.13938	mir-100-let-7a-2-mir-125b-1 cluster host gene	MIR100HG	11	-122089102
1.77219	mitochondrial ribosomal protein L34	MRPL34	19	17305667
0.733523	carbonic anhydrase 3	CA3	8	85438826
-1.41028	gap junction protein beta 1	GJB1	X	71215211
1.46045	FYVE, RhoGEF and PH domain containing 3	FGD3	9	92974435
0.721172	family with sequence similarity 160 member A1	FAM160A1	4	151409215
1.64345	chromosome 3 open reading frame 38	C3orf38	3	88149742
-1.30209	proline rich coiled-coil 2C	PRRC2C	1	171485526
1.59965	coordinator of PRMT5 and differentiation stimulator	COPRS	17	-31851864
-0.941781	carcinoembryonic antigen related cell adhesion molecule 5	CEACAM5	19	41708584
0.768531	histone cluster 1 H1 family member d	HIST1H1D	6	-26234211
1.01182	Rho GTPase activating protein 35	ARHGAP35	19	46918675
0.800186	TAM41 mitochondrial translocator assembly and maintenance homolog	TAMM41	3	-11790441
1.39136	ER membrane protein complex subunit 8	EMC8	16	-85778624
1.64387	reversion inducing cysteine rich protein with kazal motifs	RECK	9	36036912
0.819197	uncharacterized LOC100507507	LOC100507507	7	-143379154
-0.789554	fibronectin type III domain containing 9	FNDC9	5	-157341598
1.9164	melanoregulin	MREG	2	-215942590
0.539678	uncharacterized LOC101927247	LOC101927247	1	NA
-1.59251	talin 2	TLN2	15	62647310
1.62675	6-pyruvoyltetrahydropterin synthase	PTS	11	112226364
1.37572	zinc finger protein 551	ZNF551	19	57681968
0.851956	MIR4697 host gene	MIR4697HG	11	-133896434
-0.596664	calmodulin-lysine N-methyltransferase	CAMKMT	2	44361903
0.602608	ATP binding cassette subfamily F member 2	ABCF2	7	-151211483
-0.485344	D21S2088E	D21S2088E	21	-23361103
0.893356	WW domain containing E3 ubiquitin protein ligase 2	WWP2	16	69762283
-0.877628	estrogen receptor responsive lncRNA 1	ERLNC1	1	204141407
1.46375	phosphoinositide-3-kinase interacting protein 1	PIK3IP1	22	-31281592
1.26669	scaffold protein involved in DNA repair	SPIDR	8	47260877
1.70646	ring finger protein 169	RNF169	11	74748867
1.25939	Ras related GTP binding B	RRAGB	X	55717676
-0.724217	uncharacterized LOC101927531	LOC101927531	12	NA
-0.607658	uncharacterized LOC105376489	LOC105376489	10	NA
-0.974164	cadherin like and PC-esterase domain containing 1	CPED1	7	120989390
-0.878347	solute carrier family 22 member 1	SLC22A1	6	160121830
-1.53769	calsyntenin 3	CLSTN3	12	7130370
-6.42505	N-acetyltransferase 8 (putative)	NAT8	2	-73640722
1.98408	RNA binding motif protein 3	RBM3	X	48574352
-0.796856	uncharacterized LOC101927623	LOC101927623	9	86127539
0.897642	ankyrin repeat domain 7	ANKRD7	7	118224657
0.518813	caveolae associated protein 4	CAVIN4	9	100578078
1.37673	ALG1, chitobiosyldiphosphodolichol beta-mannosyltransferase	ALG1	16	5072247
-0.628454	uncharacterized LOC101928107	LOC101928107	21	-33111703
-0.75362	photoreceptor disc component	PRCD	17	76527585
1.16642	CD99 molecule like 2	CD99L2	X	-150766335
1.12835	TBC1 domain family member 20	TBC1D20	20	-435476
1.14315	chromosome 4 open reading frame 46	C4orf46	4	-158666674
3.26638	sperm associated antigen 4	SPAG4	20	35615883
1.4038	mitogen-activated protein kinase-activated protein kinase 5	MAPKAPK5	12	111842227
-0.791908	rhophilin associated tail protein 1	ROPN1	3	-123969015
0.969461	SERTA domain containing 4	SERTAD4	1	210232801
-0.614207	LINGO1 antisense RNA 2	LINGO1-AS2	15	77660050
2.24764	InaF motif containing 2	INAFM2	15	40324055
1.04336	small integral membrane protein 17	SMIM17	19	56643158
0.736345	frizzled class receptor 10	FZD10	12	130162458
1.45403	cytochrome b5 type B	CYB5B	16	69424594
2.66188	glucoside xylosyltransferase 2	GXYLT2	3	72888233
1.36394	NADH:ubiquinone oxidoreductase subunit A11	NDUFA11	19	-5894669
-1.60702	cyclin D binding myb like transcription factor 1	DMTF1	7	87152360
-1.21361	BR serine/threonine kinase 1	BRSK1	19	55284165
-1.05689	nuclear receptor interacting protein 2	NRIP2	12	-2825347
1.97604	L3MBTL4, histone methyl-lysine binding protein	L3MBTL4	18	-5954705
0.536631	gem nuclear organelle associated protein 7	GEMIN7	19	45079904
2.45032	prostaglandin reductase 2	PTGR2	14	73851917
1.46846	general transcription factor IIE subunit 2	GTF2E2	8	-30578317
2.11951	chromosome 12 open reading frame 75	C12orf75	12	105330635
-1.43089	NPHS1, nephrin	NPHS1	19	-35825371
-0.95049	uncharacterized LOC102724404	LOC102724404	5	-157362614
-1.6709	crystallin gamma E, pseudogene	CRYGEP	2	NA
1.11883	EXOC3 antisense RNA 1	EXOC3-AS1	5	-441835
-0.948771	sphingomyelin phosphodiesterase acid like 3B	SMPDL3B	1	27934954
0.877422	forkhead box K1	FOXK1	7	4682298
1.29032	interleukin 1 receptor associated kinase 4	IRAK4	12	43758943
1.62551	caspase activity and apoptosis inhibitor 1	CAAP1	9	-26840684
-0.678144	sialic acid binding Ig like lectin 11	SIGLEC11	19	-49948992
-0.881036	chromosome 3 open reading frame 20	C3orf20	3	14675098
-4.16409	alanine--glyoxylate aminotransferase 2	AGXT2	5	-34998100
-1.69998	C-type lectin domain family 1 member A	CLEC1A	12	-10069553
-1.37734	thyroid hormone receptor interactor 10	TRIP10	19	6739681
-4.75596	4-hydroxyphenylpyruvate dioxygenase	HPD	12	-121839526
-0.437859	uncharacterized LOC105369167	LOC105369167	2	NA
1.44595	uncharacterized LOC340090	LOC340090	5	-73195289
-2.60812	transmembrane protein 37	TMEM37	2	119431869
-0.795085	junctophilin 4	JPH4	14	-23568034
1.25192	signal peptide peptidase like 3	SPPL3	12	-120762509
1.61174	glucosaminyl (N-acetyl) transferase 1, core 2	GCNT1	9	76441665
-2.31657	solute carrier family 39 member 5	SLC39A5	12	56230035
1.79725	sorcin	SRI	7	-88208202
-0.485872	uncharacterized LOC101928504	LOC101928504	14	81221217
0.918156	uncharacterized LOC101927668	LOC101927668	7	-19918980
1.00915	CDC like kinase 3	CLK3	15	74608371
-1.12604	RAS like family 11 member B	RASL11B	4	52862327
1.0543	SH2 domain containing 4A	SH2D4A	8	19313569
-1.36345	G protein-coupled receptor 52	GPR52	1	174448073
-1.73073	PNN interacting serine and arginine rich protein	PNISR	6	-99398050
-0.66609	ADARB2 antisense RNA 1	ADARB2-AS1	10	1526629
-1.55158	actin filament associated protein 1 like 2	AFAP1L2	10	-114294823
1.02739	family with sequence similarity 221 member B	FAM221B	9	-35817016
1.00065	peripherin 2	PRPH2	6	-42696594
-1.5762	transient receptor potential cation channel subfamily M member 3	TRPM3	9	-70535048
-3.6942	solute carrier family 22 member 11	SLC22A11	11	64555600
1.0895	ariadne RBR E3 ubiquitin protein ligase 2	ARIH2	3	48918819
-1.54913	ankyrin repeat domain 12	ANKRD12	18	9137562
0.935022	TAF1A antisense RNA 1	TAF1A-AS1	1	222589919
0.810415	R3H domain and coiled-coil containing 1 like	R3HCC1L	10	98134623
1.51084	transducin beta like 2	TBL2	7	-73568945
-1.68787	long intergenic non-protein coding RNA 671	LINC00671	17	-42874673
-0.796814	long intergenic non-protein coding RNA 1547	LINC01547	21	-44934725
2.536	T cell immunoglobulin and mucin domain containing 4	TIMD4	5	-156919281
-0.499078	uncharacterized LOC283045	LOC283045	10	-62339587
-0.661957	uncharacterized LOC101929657	LOC101929657	13	52128894
-0.81688	uncharacterized LOC101928565	LOC101928565	1	-168464113
-1.42466	zinc finger protein 615	ZNF615	19	-51991333
-3.65373	dipeptidase 1	DPEP1	16	89620591
1.13241	serine palmitoyltransferase long chain base subunit 1	SPTLC1	9	-92031133
-5.10534	solute carrier family 16 member 9	SLC16A9	10	-59650763
-0.856974	FERM domain containing 1	FRMD1	6	-168055783
-0.446465	MAS related GPR family member X1	MRGPRX1	11	-18933812
2.31437	copine 2	CPNE2	16	57092542
3.73858	interleukin 18	IL18	11	-112143250
2.32486	tetratricopeptide repeat domain 7B	TTC7B	14	-90540587
1.12691	phosphopantothenoylcysteine decarboxylase	PPCDC	15	75023554
-0.514003	zinc finger protein 280A	ZNF280A	22	-22513735
-1.34887	solute carrier family 5 member 2	SLC5A2	16	31483117
1.08522	general transcription factor IIIC subunit 5	GTF3C5	9	133030674
1.72123	metallothionein 3	MT3	16	56589336
-0.909889	chromosome 20 open reading frame 203	C20orf203	20	-32631624
-1.10298	uncharacterized LOC105378349	LOC105378349	10	70939052
-0.414715	transient receptor potential cation channel subfamily C member 4	TRPC4	13	-37632062
-1.55609	coiled-coil domain containing 178	CCDC178	18	-32937401
1.47637	UBA domain containing 1	UBAC1	9	-135932968
-2.29355	SH3 domain binding protein 5	SH3BP5	3	-15254355
1.01085	torsin family 1 member A	TOR1A	9	-129812941
1.16303	zinc finger protein 200	ZNF200	16	-3222324
0.812684	tubulin polyglutamylase complex subunit 2	TPGS2	18	-36798017
0.977994	ubiquinol-cytochrome c reductase, complex III subunit XI	UQCR11	19	-1597154
-0.772857	forkhead box N2	FOXN2	2	48314655
-1.73238	centrosomal protein 135	CEP135	4	55948807
2.76986	chromosome 5 open reading frame 30	C5orf30	5	103259356
-1.35005	malate dehydrogenase 1B	MDH1B	2	-206737764
2.46005	T cell receptor alpha constant	TRAC	14	NA
0.775439	GA binding protein transcription factor beta subunit 1	GABPB1	15	-50277191
1.46677	hyperpolarization activated cyclic nucleotide gated potassium and sodium channel 2	HCN2	19	589892
1.88776	cytochrome P450 family 2 subfamily R member 1	CYP2R1	11	-14878009
-1.38778	PLCE1 antisense RNA 2	PLCE1-AS2	10	-94081949
1.24034	serine/threonine kinase 35	STK35	20	2101881
-1.9098	Dmx like 1	DMXL1	5	119071086
1.80902	EPH receptor B1	EPHB1	3	134795256
0.612183	L3MBTL2, polycomb repressive complex 1 subunit	L3MBTL2	22	41205308
1.29347	solute carrier family 4 member 5	SLC4A5	2	-74216241
-0.898743	glomulin, FKBP associated protein	GLMN	1	-92246397
-0.856243	PHD finger protein 3	PHF3	6	63646525
-0.784268	Sp3 transcription factor	SP3	2	-173906458
0.73914	zinc finger CCCH-type containing 10	ZC3H10	12	56118219
-0.89632	ribosomal protein L7a pseudogene 9	RPL7AP9	12	NA
-1.56072	long intergenic non-protein coding RNA 473	LINC00473	6	-165939455
-2.43629	napsin A aspartic peptidase	NAPSA	19	-50358471
-1.36473	family with sequence similarity 89 member A	FAM89A	1	-231018957
0.473988	purinergic receptor P2Y1	P2RY1	3	152834692
-0.503464	zinc finger MYM-type containing 2	ZMYM2	13	19958669
0.74252	membrane associated ring-CH-type finger 4	2019-03-04	2	-216257861
-0.695412	testis-specific transcript, Y-linked 12 (non-protein coding)	TTTY12	Y	7804923
1.48285	component of oligomeric golgi complex 7	COG7	16	-23388492
1.80627	zinc finger protein 304	ZNF304	19	57351273
-0.730166	ceramide synthase 3	CERS3	15	-100400394
-0.909669	Fer3 like bHLH transcription factor	FERD3L	7	-19144781
1.20289	chromosome 22 open reading frame 39	C22orf39	22	-19443149
1.51424	DnaJ heat shock protein family (Hsp40) member C17	DNAJC17	15	-40767868
0.503691	uncharacterized LOC107986127	LOC107986127	3	NA
-4.79343	agmatinase	AGMAT	1	-15571698
1.30341	DnaJ heat shock protein family (Hsp40) member C14	DNAJC14	12	-55820959
1.35529	RNA polymerase II subunit J	POLR2J	7	-102473100
0.966733	PHD and ring finger domains 1	PHRF1	11	576445
0.652089	zinc finger protein 71	ZNF71	19	56595295
-1.23783	chromosome 9 open reading frame 131	C9orf131	9	35042207
2.14605	MIR570 host gene	MIR570HG	3	-81798
-1.23445	EF-hand and coiled-coil domain containing 1	EFCC1	3	129001628
-1.99815	calpain 12	CAPN12	19	-38730191
0.754038	chromosome 7 open reading frame 25	C7orf25	7	-42909272
0.884871	intraflagellar transport 43	IFT43	14	75985752
0.751338	tropomodulin 2	TMOD2	15	51751560
-0.920812	HIPK1 antisense RNA 1	HIPK1-AS1	1	-113924000
-1.40573	transcobalamin 1	TCN1	11	-59852807
1.42552	charged multivesicular body protein 2A	CHMP2A	19	-58551565
3.34254	complement C3b/C4b receptor 1 like	CR1L	1	207645112
0.682857	DAP3 binding cell death enhancer 1	DELE1	5	141923819
1.53243	POP7 homolog, ribonuclease P/MRP subunit	POP7	7	100706052
1.90051	indoleamine 2,3-dioxygenase 1	IDO1	8	39913808
-1.58426	zinc finger protein 354A	ZNF354A	5	-178711520
1.48803	RecQ mediated genome instability 2	RMI2	16	11345437
1.03287	small nuclear RNA activating complex polypeptide 5	SNAPC5	15	-66493467
-1.57046	protein kinase N2	PKN2	1	88684143
0.867542	ASAP1 intronic transcript 2	ASAP1-IT2	8	-130082737
1.44553	uncharacterized LOC100505938	LOC100505938	7	8262224
0.93624	uncharacterized LOC100506125	LOC100506125	12	48789146
3.01489	integral membrane protein 2A	ITM2A	X	-79360383
0.802664	CBFA2/RUNX1 translocation partner 2	CBFA2T2	20	33562364
2.16668	NPC intracellular cholesterol transporter 1	NPC1	18	-23531498
0.470692	structural maintenance of chromosomes 1A	SMC1A	X	-53374148
1.86422	cyclin G2	CCNG2	4	77157203
-0.93704	cannabinoid receptor 2	CNR2	1	-23873969
1.19354	histone H4 transcription factor	HINFP	11	119121522
1.37733	SPINT1 antisense RNA 1	SPINT1-AS1	15	-40835992
-2.2013	ELL associated factor 2	EAF2	3	121835179
2.34027	zinc finger DHHC-type containing 23	ZDHHC23	3	113947900
-0.760928	adenylate kinase 9	AK9	6	-109631695
1.96835	ceramide synthase 4	CERS4	19	8209332
1.5537	MyoD family inhibitor domain containing	MDFIC	7	114922153
0.612085	keratin 36	KRT36	17	-41486135
0.623337	N-deacetylase and N-sulfotransferase 1	NDST1	5	150508111
1.10591	presenilin associated rhomboid like	PARL	3	-183829384
-0.862864	IL12A antisense RNA 1	IL12A-AS1	3	-159913400
-1.02037	leucine rich repeat containing 74B	LRRC74B	22	21045959
2.48394	interleukin 15	IL15	4	141636595
-0.812189	keratin 2	KRT2	12	-52644557
0.37599	DNA polymerase beta	POLB	8	42338454
0.348669	zinc finger protein 91 pseudogene	LOC441666	10	-42331865
0.875884	ring finger protein 26	RNF26	11	119334499
-1.1538	chromosome 11 open reading frame 16	C11orf16	11	-8920075
-1.67798	zinc finger protein 644	ZNF644	1	-90915299
-1.44026	DnaJ heat shock protein family (Hsp40) member C3	DNAJC3	13	95677138
2.18082	focadhesin	FOCAD	9	20658308
-2.29911	serine hydroxymethyltransferase 1	SHMT1	17	-18327859
-1.35569	N-acetylglutamate synthase	NAGS	17	44004663
1.42541	DEAD-box helicase 23	DDX23	12	-48829755
-0.854716	shroom family member 4	SHROOM4	X	-50591644
1.13902	LHFPL tetraspan subfamily member 4	LHFPL4	3	-9498360
-1.4733	nuclear export mediator factor	NEMF	14	-49783520
1.87879	neuregulin 3	NRG3	10	81875313
-0.575498	BTG anti-proliferation factor 4	BTG4	11	-111467530
-0.725059	long intergenic non-protein coding RNA 112	LINC00112	21	41716435
-1.54393	WASH complex subunit 4	WASHC4	12	105107713
2.67325	beta-carotene oxygenase 2	BCO2	11	112176365
-0.37101	uncharacterized LOC101927723	LOC101927723	2	NA
1.26781	mitochondrial rRNA methyltransferase 2	MRM2	7	-2234290
-1.29932	basal body orientation factor 1	BBOF1	14	74019355
1.71598	ST3 beta-galactoside alpha-2,3-sialyltransferase 1	ST3GAL1	8	-133454847
-0.5057	uncharacterized LOC102724434	LOC102724434	7	-116275605
-0.815953	HDAC2 and HS3ST5 antisense RNA 2	HDAC2-AS2	6	113969700
-0.768146	zinc finger protein 324B	ZNF324B	19	58451603
0.886686	ring finger protein 121	RNF121	11	71928721
1.42041	zinc finger protein 256	ZNF256	19	-57940832
1.14585	C1q and TNF related 2	C1QTNF2	5	-160347767
-0.812254	uncharacterized LOC101929398	LOC101929398	8	NA
-0.812249	interferon alpha 10	IFNA10	9	-21206180
1.63328	thyroid hormone receptor beta	THRB	3	-24117153
1.09328	NAD synthetase 1	NADSYN1	11	71453170
-1.0309	ghrelin and obestatin prepropeptide	GHRL	3	-10285749
1.42853	RNA polymerase I subunit E	POLR1E	9	37485934
1.67255	tripartite motif containing 68	TRIM68	11	-4598671
-0.59336	diacylglycerol kinase beta	DGKB	7	-14145048
1.21245	nuclear receptor subfamily 1 group H member 2	NR1H2	19	50376422
0.718057	mitochondrial ribosome associated GTPase 2	MTG2	20	62183024
1.79003	steroid 5 alpha-reductase 1	SRD5A1	5	6633321
0.68387	DDB1 and CUL4 associated factor 1	DCAF1	3	-51395866
1.44707	ergosterol biosynthesis 28 homolog	ERG28	14	-75650889
1.13508	mastermind like transcriptional coactivator 3	MAML3	4	-139716390
1.09461	DSN1 homolog, MIS12 kinetochore complex component	DSN1	20	-36751790
-0.952261	RNA binding motif protein 43	RBM43	2	-151248213
-0.643486	NIMA related kinase 11	NEK11	3	131026849
2.57838	platelet derived growth factor receptor like	PDGFRL	8	17576432
2.19704	nudix hydrolase 7	NUDT7	16	77722491
-0.890176	zinc finger and BTB domain containing 25	ZBTB25	14	-64486237
0.786077	zinc finger protein 74	ZNF74	22	20394114
-0.452527	uncharacterized LOC401312	LOC401312	7	-22649959
2.14969	LON peptidase N-terminal domain and ring finger 1	LONRF1	8	-12721894
-0.462362	C-C motif chemokine receptor 6	CCR6	6	167122752
2.36224	insulin induced gene 1	INSIG1	7	155297771
1.01556	pleckstrin homology and FYVE domain containing 1	PLEKHF1	19	29665419
-1.0059	uncharacterized LOC105372637	LOC105372637	20	NA
1.45206	cysteinyl-tRNA synthetase	CARS	11	-3000921
-0.907109	complexin 3	CPLX3	15	74826609
1.17484	methyl-CpG binding protein 2	MECP2	X	-154030234
0.731781	KH domain containing 3 like, subcortical maternal complex member	KHDC3L	6	73362676
1.22058	FAD dependent oxidoreductase domain containing 1	FOXRED1	11	126269039
1.11988	selenoprotein H	SELENOH	11	57741249
-0.690424	serpin family A member 12	SERPINA12	14	-94487282
-2.14095	mucin 15, cell surface associated	MUC15	11	-26559031
1.45754	small nuclear ribonucleoprotein D1 polypeptide	SNRPD1	18	21612268
1.06544	coiled-coil domain containing 32	CCDC32	15	-40552912
0.883307	nuclear cap binding protein subunit 1	NCBP1	9	97633422
1.37312	GID complex subunit 8 homolog	GID8	20	62938088
-0.697729	uncharacterized LOC100507388	LOC100507388	4	-74955973
-0.62378	outer dense fiber of sperm tails 4	ODF4	17	8339869
1.33307	astrotactin 2	ASTN2	9	-116610843
1.73636	riboflavin kinase	RFK	9	-76385516
-1.65065	solute carrier family 34 member 1	SLC34A1	5	177384430
0.928472	surfeit 6	SURF6	9	-133330706
1.59991	3-hydroxybutyrate dehydrogenase 1	BDH1	3	12394
0.821216	aryl hydrocarbon receptor interacting protein	AIP	11	67483515
-0.785719	chromosome 22 open reading frame 34	C22orf34	22	-49414524
-0.539201	ectonucleoside triphosphate diphosphohydrolase 3	ENTPD3	3	40387155
2.04752	ATPase H+ transporting V1 subunit B1	ATP6V1B1	2	70935867
-0.71854	SPATA31 subfamily D member 1	SPATA31D1	9	81988771
-0.611841	long intergenic non-protein coding RNA 1122	LINC01122	2	58520752
0.754863	small nuclear RNA activating complex polypeptide 4	SNAPC4	9	-136375568
-2.419	transmembrane protein 174	TMEM174	5	73173195
-0.649423	long intergenic non-protein coding RNA 2272	LINC02272	4	NA
1.28749	chromosome 15 open reading frame 59	C15orf59	15	-73735430
1.22183	mitoguardin 2	MIGA2	9	129036510
1.07428	transcriptional adaptor 2B	TADA2B	4	7043428
1.24252	stromal interaction molecule 1	STIM1	11	3855702
-0.734038	regulator of microtubule dynamics 2	RMDN2	2	37928758
-0.58295	prostate cancer associated 3 (non-protein coding)	PCA3	9	76764435
-1.54388	uncharacterized LOC101927759	LOC101927759	6	3024062
-1.21117	uncharacterized LOC102723335	LOC102723335	15	100558665
1.01927	coiled-coil domain containing 114	CCDC114	19	-48296451
1.94025	frizzled class receptor 2	FZD2	17	44557443
-0.457383	uncharacterized LOC285000	LOC285000	2	-105593096
0.584234	spindle and kinetochore associated complex subunit 1	SKA1	18	50375021
-0.807657	EDNRB antisense RNA 1	EDNRB-AS1	13	77818936
1.21013	succinate dehydrogenase complex assembly factor 2	SDHAF2	11	61430124
-0.41906	histamine receptor H4	HRH4	18	24460628
-3.89469	parathyroid hormone 1 receptor	PTH1R	3	46877745
2.24192	serine peptidase inhibitor, Kazal type 5	SPINK5	5	148063971
1.25858	leucine rich repeat protein 1	LRR1	14	49598696
1.18116	protein phosphatase 2 regulatory subunit B''beta	PPP2R3B	X	-17128
1.78323	anoctamin 10	ANO10	3	-43366325
2.13938	ribosomal protein S21	RPS21	20	62387064
1.47427	ATPase H+ transporting V1 subunit H	ATP6V1H	8	-53715542
0.750951	mitochondrial transcription termination factor 4	MTERF4	2	-241087093
-0.859769	acrosomal vesicle protein 1	ACRV1	11	-125672333
0.931784	NIPA magnesium transporter 2	NIPA2	15	22838640
2.28825	glycerol-3-phosphate dehydrogenase 1 like	GPD1L	3	32106510
-1.46301	LON peptidase N-terminal domain and ring finger 3	LONRF3	X	118974613
0.9847	zinc finger protein pseudogene	LOC728743	7	150405751
0.999108	RNA binding motif protein 48	RBM48	7	92528772
-0.867787	long intergenic non-protein coding RNA 1271	LINC01271	20	-50310710
-0.820109	keratin associated protein 8-1	KRTAP8-1	21	-30812696
-0.926277	uncharacterized DKFZp779M0652	DKFZp779M0652	11	45771431
-1.19417	coiled-coil and C2 domain containing 2B	CC2D2B	10	95907964
-1.08392	BPI fold containing family A member 3	BPIFA3	20	33217309
0.674537	NTPase KAP family P-loop domain containing 1	NKPD1	19	-45149749
0.962589	symplekin	SYMPK	19	-45815441
1.6273	DNA polymerase epsilon 4, accessory subunit	POLE4	2	74958642
0.937538	uncharacterized LOC105378753	LOC105378753	1	NA
-1.56969	lymphatic vessel endothelial hyaluronan receptor 1	LYVE1	11	-10557865
-0.48634	uncharacterized LOC285819	LOC285819	6	-26471943
-0.812398	uncharacterized LOC285847	LOC285847	6	-35726761
0.922333	HOXB cluster antisense RNA 3	HOXB-AS3	17	48590419
-3.38182	solute carrier family 4 member 4	SLC4A4	4	71187285
3.05839	solute carrier family 4 member 1 (Diego blood group)	SLC4A1	17	-44248389
-1.41443	NCK associated protein 1	NCKAP1	2	-182924850
1.23809	HscB mitochondrial iron-sulfur cluster cochaperone	HSCB	22	28742031
1.87215	Rap1 GTPase-GDP dissociation stimulator 1	RAP1GDS1	4	98261375
0.877679	TTC28 antisense RNA 1	TTC28-AS1	22	27919375
0.679766	poliovirus receptor	PVR	19	44643797
0.757002	serine/threonine kinase 11	STK11	19	1205798
-0.617338	coiled-coil domain containing 170	CCDC170	6	151494039
-0.892301	long intergenic non-protein coding RNA 1649	LINC01649	1	115919375
1.10439	microspherule protein 1	MCRS1	12	-49558302
0.683248	p21 (RAC1) activated kinase 1	PAK1	11	-77322014
-1.79008	neural precursor cell expressed, developmentally down-regulated 4, E3 ubiquitin protein ligase	NEDD4	15	-55826918
2.33028	mitotic arrest deficient 2 like 1	MAD2L1	4	-120059423
-6.19096	gamma-butyrobetaine hydroxylase 1	BBOX1	11	27040961
0.99662	HOXA11 antisense RNA	HOXA11-AS	7	27185407
0.746051	zinc finger protein 419	ZNF419	19	57487710
-0.754009	four and a half LIM domains 5	FHL5	6	96562524
0.844452	chromosome 11 open reading frame 68	C11orf68	11	-65916811
0.886956	golgin A3	GOLGA3	12	-132768908
0.699044	trichoplein keratin filament binding	TCHP	12	109900273
1.36198	regulator of G protein signaling 4	RGS4	1	163068605
1.33427	cyclin and CBS domain divalent metal cation transport mediator 4	CNNM4	2	96760901
1.22571	zinc finger matrin-type 2	ZMAT2	5	140700359
1.00002	deoxyguanosine kinase	DGUOK	2	73926825
-1.5101	KIAA1551	KIAA1551	12	31959418
-2.02663	lysine methyltransferase 2E	KMT2E	7	105014189
-1.15446	fasciculation and elongation protein zeta 1	FEZ1	11	-125445744
-1.14091	estrogen related receptor beta	ESRRB	14	76371346
1.13707	mitochondrial ribosomal protein L48	MRPL48	11	73787871
-3.54786	solute carrier family 7 member 9	SLC7A9	19	-32830510
1.14913	N-acetyltransferase 10	NAT10	11	34105563
-1.86027	glutaminase	GLS	2	190880820
-0.824718	B9 domain containing 1	B9D1	17	-19343444
-1.22924	ASH1L antisense RNA 1	ASH1L-AS1	1	155562041
-1.39299	copine 8	CPNE8	12	-38652199
1.19911	KIAA0930	KIAA0930	22	-45192241
-0.871727	leishmanolysin like peptidase	LMLN	3	197960199
-0.421476	coiled-coil domain containing 18	CCDC18	1	93180715
-0.405362	chromosome 8 open reading frame 49 (putative)	C8orf49	8	11761255
-1.28997	RNA binding motif protein 25	RBM25	14	73058512
-0.665625	uncharacterized LOC101927159	LOC101927159	20	42685482
-0.645743	RNA polymerase II associated protein 2	RPAP2	1	92298964
2.81081	twist family bHLH transcription factor 1	TWIST1	7	-19115467
0.720965	NEDD4 binding protein 1	N4BP1	16	-48538725
-1.46414	coiled-coil domain containing 191	CCDC191	3	-113964136
-5.253	flavin containing monooxygenase 1	FMO1	1	171257922
-1.49133	dendrin	DDN	12	-48995149
1.25872	poly(ADP-ribose) polymerase 2	PARP2	14	20343613
0.896606	NADH:ubiquinone oxidoreductase subunit A7	NDUFA7	19	-8311349
-1.06961	uncharacterized LOC101928324	LOC101928324	1	-26462756
1.57434	abhydrolase domain containing 2	ABHD2	15	89088149
1.47432	tRNA methyltransferase 1	TRMT1	19	-13104899
1.58082	NCBP2 antisense RNA 2 (head to head)	NCBP2-AS2	3	196942622
1.12973	vitamin K epoxide reductase complex subunit 1 like 1	VKORC1L1	7	65873098
0.574133	histone cluster 1 H4 family member g	HIST1H4G	6	-26246610
-1.22926	SH3 domain containing 19	SH3D19	4	-151120280
-0.6333	aquaporin 8	AQP8	16	25216963
1.07592	heterogeneous nuclear ribonucleoprotein C (C1/C2)	HNRNPC	14	-21209135
-2.8936	aquaporin 3 (Gill blood group)	AQP3	9	-33441153
-0.755726	ring finger protein 112	RNF112	17	19411177
-0.904269	uncharacterized LOC105375728	LOC105375728	8	NA
-0.71346	vomeronasal 1 receptor 2	VN1R2	19	53258291
-0.543731	uncharacterized LOC101928333	LOC101928333	7	127215126
1.67814	polysaccharide biosynthesis domain containing 1	PBDC1	X	76172928
0.910412	IBA57, iron-sulfur cluster assembly	IBA57	1	228165807
1.92583	chromosome 15 open reading frame 61	C15orf61	15	67521183
1.77692	myelin protein zero like 3	MPZL3	11	-118226689
0.993702	lon peptidase 2, peroxisomal	LONP2	16	48244166
-0.653007	long intergenic non-protein coding RNA 1647	LINC01647	1	11609530
-1.23775	immunoglobulin superfamily member 5	IGSF5	21	39745406
-3.34281	long intergenic non-protein coding RNA 1697	LINC01697	21	28048413
1.3605	reticulocalbin 3	RCN3	19	49527617
-0.698186	serpin family B member 5	SERPINB5	18	63476910
1.67097	CD300a molecule	CD300A	17	74466372
1.06729	LDL receptor related protein 12	LRP12	8	-104489230
-0.950049	DDB1 and CUL4 associated factor 8 like 2	DCAF8L2	X	27590381
-2.42003	prostate androgen-regulated mucin-like protein 1	PARM1	4	74933074
1.28077	ATP binding cassette subfamily B member 7	ABCB7	X	-75053279
1.03081	kinase non-catalytic C-lobe domain containing 1	KNDC1	10	133160453
1.60671	chromosome 1 open reading frame 226	C1orf226	1	162381729
0.734954	CREB binding protein	CREBBP	16	-3725054
-2.84768	podocalyxin like	PODXL	7	-131500261
1.94782	EPB41L4A divergent transcript	EPB41L4A-DT	5	112419582
-0.678412	CIRBP antisense RNA 1	CIRBP-AS1	19	-1267470
1.72328	zinc finger protein 552	ZNF552	19	-57807081
1.69137	mannosidase beta	MANBA	4	-102631485
1.21933	ubiquinol-cytochrome c reductase complex III subunit VII	UQCRQ	5	132866626
1.21842	tetratricopeptide repeat and ankyrin repeat containing 1	TRANK1	3	-36826816
1.75768	serine/threonine kinase 17a	STK17A	7	43583092
1.06027	BAI1 associated protein 3	BAIAP3	16	1334503
1.36806	ATP synthase membrane subunit 6.8PL	ATP5MPL	14	-103912287
3.56191	growth arrest specific 2	GAS2	11	22666613
-0.553482	uncharacterized LOC105372520	LOC105372520	20	NA
-3.65982	solute carrier family 22 member 8	SLC22A8	11	-62992823
-0.638689	uncharacterized LOC105369602	LOC105369602	12	NA
-0.618207	G protein-coupled receptor 63	GPR63	6	-96794121
0.59072	uncharacterized LOC107986160	LOC107986160	3	NA
-1.56794	uncharacterized LOC101926915	LOC101926915	6	46276323
0.888516	Fanconi anemia complementation group E	FANCE	6	35452360
1.65213	mitochondrial ribosomal protein S33	MRPS33	7	-141006160
-1.65524	cold shock domain containing C2	CSDC2	22	41561009
1.20787	methionyl aminopeptidase 1	METAP1	4	98995636
0.643297	cysteine rich tail 1	CYSRT1	9	137224634
1.53582	MINDY lysine 48 deubiquitinase 1	MINDY1	1	-150996824
1.27035	ring finger and WD repeat domain 3	RFWD3	16	-74621398
1.16044	matrix metallopeptidase 13	MMP13	11	-102942991
-0.629503	long intergenic non-protein coding RNA 911	LINC00911	14	85393878
1.47569	transmembrane protein 68	TMEM68	8	-55738743
-0.635329	ripply transcriptional repressor 3	RIPPLY3	21	37006562
-0.778307	nestin	NES	1	-156668762
1.10678	forkhead box N3	FOXN3	14	-89156171
1.10921	sec1 family domain containing 2	SCFD2	4	-52872983
-0.962385	troponin I1, slow skeletal type	TNNI1	1	-201403766
0.862638	VPS33B interacting protein, apical-basolateral polarity regulator, spe-39 homolog	VIPAS39	14	-77426674
-0.943883	long intergenic non-protein coding RNA 2517	LINC02517	4	8320175
1.13443	solute carrier family 38 member 4	SLC38A4	12	-46764760
1.40817	coatomer protein complex subunit gamma 1	COPG1	3	129249609
-0.488669	cylicin 2	CYLC2	9	102995310
0.794256	NRDE-2, necessary for RNA interference, domain containing	NRDE2	14	-90278053
-0.503457	X-C motif chemokine receptor 1	XCR1	3	-46020798
1.37431	torsin family 1 member B	TOR1B	9	129803142
-0.780416	thyrotropin releasing hormone receptor	TRHR	8	109087423
-1.54798	cysteine and tyrosine rich 1	CYYR1	21	-26466208
0.53569	SUMO specific peptidase 5	SENP5	3	196867855
1.253	ribosomal protein L15 pseudogene 22	RPL15P22	22	NA
0.876516	von Hippel-Lindau tumor suppressor	VHL	3	10141634
-1.13902	glycosylphosphatidylinositol anchored molecule like	GML	8	142834800
1.27167	LDL receptor related protein associated protein 1	LRPAP1	4	-3503596
0.57726	MAGE family member B1	MAGEB1	X	30243730
1.97124	uncharacterized LOC283177	LOC283177	11	134436481
1.01403	NPR3 like, GATOR1 complex subunit	NPRL3	16	-85804
0.871036	NADH:ubiquinone oxidoreductase subunit B1	NDUFB1	14	-92116123
0.717089	DExH-box helicase 30	DHX30	3	47802908
1.13394	cellular retinoic acid binding protein 2	CRABP2	1	-156699607
-0.538645	DTW domain containing 2	DTWD2	5	-118836073
1.70467	transmembrane 7 superfamily member 2	TM7SF2	11	65111853
1.81185	paired related homeobox 1	PRRX1	1	170664171
-2.03349	cilia and flagella associated protein 36	CFAP36	2	55519594
0.76086	proprotein convertase subtilisin/kexin type 7	PCSK7	11	-117205070
2.91777	retinoic acid receptor responder 3	RARRES3	11	63536800
-1.50644	utrophin	UTRN	6	144291736
1.41829	nucleoporin 205	NUP205	7	135557913
-0.580395	extended synaptotagmin 3	ESYT3	3	138434572
0.865781	polo like kinase 1	PLK1	16	23678771
-1.04982	calsequestrin 2	CASQ2	1	-115700004
2.02686	TBC1 domain family member 24	TBC1D24	16	2475145
1.02175	HEAT repeat containing 3	HEATR3	16	50065940
1.583	solute carrier family 22 member 15	SLC22A15	1	115976497
-4.5254	cystin 1	CYS1	2	-10056798
0.599875	snail family transcriptional repressor 3	SNAI3	16	-88677681
0.812133	pleckstrin homology domain containing A8 pseudogene 1	PLEKHA8P1	12	-45173033
-0.69257	long intergenic non-protein coding RNA 1356	LINC01356	1	-112820168
1.14205	inositol-trisphosphate 3-kinase A	ITPKA	15	41493857
1.33294	spermatogenesis associated serine rich 2	SPATS2	12	49366904
1.76865	suppression of tumorigenicity 14	ST14	11	130159786
-0.665631	multiple C2 and transmembrane domain containing 2	MCTP2	15	94298200
0.898723	coiled-coil domain containing 12	CCDC12	3	-46921729
-0.680184	calcium voltage-gated channel auxiliary subunit gamma 6	CACNG6	19	53992287
-1.07041	olfactory receptor family 6 subfamily B member 1	OR6B1	7	144003996
2.23345	PAXIP1 antisense RNA 1 (head to head)	PAXIP1-AS1	7	155003432
-0.761354	apolipoprotein B mRNA editing enzyme catalytic subunit 2	APOBEC2	6	41053200
-2.05391	long intergenic non-protein coding RNA 2535	LINC02535	6	-85387218
0.550613	CWF19 like 1, cell cycle control (S. pombe)	CWF19L1	10	-100232295
-0.48822	uncharacterized LOC107985861	LOC107985861	2	NA
-0.793217	uncharacterized LOC221122	LOC221122	11	44973901
0.796713	BCL2, apoptosis regulator	BCL2	18	-63123345
1.68293	H2.0 like homeobox	HLX	1	220879400
0.946886	DEAD-box helicase 49	DDX49	19	18919674
1.59418	long intergenic non-protein coding RNA 1560	LINC01560	X	47482715
2.54992	galectin 3	LGALS3	14	55129216
-0.814087	bromodomain and WD repeat domain containing 1	BRWD1	21	-39185477
1.60112	LIM domain and actin binding 1	LIMA1	12	-50175779
0.786238	peptidylprolyl isomerase A pseudogene 21	PPIAP21	20	NA
-0.789079	coiled-coil and C2 domain containing 2A	CC2D2A	4	15469864
-0.851449	zinc finger protein 583	ZNF583	19	56404324
1.62252	small nuclear ribonucleoprotein U11/U12 subunit 25	SNRNP25	16	53828
-0.753316	ADAM metallopeptidase domain 11	ADAM11	17	44759178
0.950066	eukaryotic translation initiation factor 2B subunit alpha	EIF2B1	12	-123621022
0.846108	ankyrin repeat and SOCS box containing 7	ASB7	15	100602549
0.833807	elongator acetyltransferase complex subunit 2	ELP2	18	36129873
-1.40328	ASH1 like histone lysine methyltransferase	ASH1L	1	-155335260
2.95049	KIT proto-oncogene receptor tyrosine kinase	KIT	4	54657927
1.31659	cytochrome c oxidase subunit 6C	COX6C	8	-99877994
0.910586	huntingtin	HTT	4	3074680
-1.61005	ADP ribosylation factor like GTPase 13B	ARL13B	3	93980138
-4.19713	cubilin	CUBN	10	-16823965
-1.13816	protein tyrosine phosphatase, receptor type B	PTPRB	12	-70515870
0.346574	uncharacterized LOC79150	MGC4859	7	-10449819
1.25717	neuroguidin	NGDN	14	23469688
-0.779587	G protein-coupled receptor 101	GPR101	X	-137030147
1.21108	nudix hydrolase 16 like 1	NUDT16L1	16	4693692
-3.45248	solute carrier family 5 member 12	SLC5A12	11	-26667018
1.47291	caspase recruitment domain family member 19	CARD19	9	93096122
-0.650056	T cell receptor alpha variable 24	TRAV24	14	NA
-2.52183	nuclear receptor subfamily 2 group F member 1	NR2F1	5	93583336
-1.20638	ectodysplasin A receptor	EDAR	2	-108894470
-0.685616	AT-rich interaction domain 5B	ARID5B	10	61901253
0.664737	BCL2 interacting protein 1	BNIP1	5	173144441
2.43163	Rh family B glycoprotein (gene/pseudogene)	RHBG	1	156369188
1.65693	histidine triad nucleotide binding protein 3	HINT3	6	125956714
-1.35971	ankyrin repeat and SOCS box containing 12	ASB12	X	-64224191
1.06831	emopamil binding protein (sterol isomerase)	EBP	X	48521775
0.805457	transmembrane protein 229B	TMEM229B	14	-67470265
-0.678375	LYR motif containing 2	LYRM2	6	-89632223
1.38976	family with sequence similarity 69 member B	FAM69B	9	136712571
-0.835514	long intergenic non-protein coding RNA 668	LINC00668	18	-6925473
-0.935228	glypican 2	GPC2	7	-100169605
1.88499	zinc finger DHHC-type containing 4	ZDHHC4	7	6577433
1.56408	G elongation factor mitochondrial 2	GFM2	5	-74736343
-0.793326	uncharacterized LOC105378688	LOC105378688	1	NA
-0.613158	X-C motif chemokine ligand 1	XCL1	1	168576472
-1.07728	pericentriolar material 1	PCM1	8	17922856
1.33533	RNA polymerase II subunit I	POLR2I	19	-36113708
0.822935	2-oxoglutarate and iron dependent oxygenase domain containing 2	OGFOD2	12	122974702
0.510631	GATA2 antisense RNA 1	GATA2-AS1	3	128489202
-0.444853	BCL2 interacting protein like	BNIPL	1	151036552
-0.966628	uncharacterized LOC112268241	LOC112268241	19	NA
1.31492	barttin CLCNK type accessory beta subunit	BSND	1	54998943
1.86857	family with sequence similarity 162 member A	FAM162A	3	122384175
1.1484	dolichyl-phosphate mannosyltransferase subunit 2, regulatory	DPM2	9	-127935094
-1.4257	transmembrane protein 31	TMEM31	X	103710908
1.47502	translocase of inner mitochondrial membrane 13	TIMM13	19	-2425623
0.95619	ATP binding cassette subfamily F member 3	ABCF3	3	184186074
-0.880641	long intergenic non-protein coding RNA 1831	LINC01831	2	-104412151
-0.876372	receptor accessory protein 2	REEP2	5	138439000
-1.61758	DnaJ heat shock protein family (Hsp40) member C2	DNAJC2	7	-103312473
-1.66115	bromodomain adjacent to zinc finger domain 2B	BAZ2B	2	-159318978
0.881386	zinc finger protein 653	ZNF653	19	-11483426
-1.85432	long intergenic non-protein coding RNA 924	LINC00924	15	95433092
-1.5116	pyruvate kinase L/R	PKLR	1	-94315
-1.2932	uncharacterized LOC105371508	LOC105371508	17	NA
1.29257	zinc finger protein 630	ZNF630	X	-48058177
0.641199	microcephalin 1	MCPH1	8	6406591
0.875706	angel homolog 1	ANGEL1	14	-76787242
-1.99713	aminoacylase 3	ACY3	11	-67642554
1.92028	ring finger protein 145	RNF145	5	-159157408
0.540024	zinc finger and SCAN domain containing 32	ZSCAN32	16	-3382080
-4.10055	betaine--homocysteine S-methyltransferase	BHMT	5	79111780
1.73111	centromere protein M	CENPM	22	-41938720
0.844082	NudC domain containing 3	NUDCD3	7	-44382365
-0.755049	interleukin 5	IL5	5	-132541443
-0.970687	CDC42 binding protein kinase alpha	CDC42BPA	1	-226989864
1.07429	chromosome 7 open reading frame 26	C7orf26	7	6590020
1.05059	chromatin assembly factor 1 subunit B	CHAF1B	21	36385390
-0.948625	putative uncharacterized protein LOC151760	LOC151760	3	NA
0.833795	ring finger protein 40	RNF40	16	30761611
-4.07492	ADAMTS9 antisense RNA 1	ADAMTS9-AS1	3	64561345
-2.45474	APOBEC1 complementation factor	A1CF	10	-50799408
2.16808	AZIN1 antisense RNA 1	AZIN1-AS1	8	102864270
-1.67906	heat shock protein family B (small) member 6	HSPB6	19	-35754565
0.727896	TBC1 domain family member 30	TBC1D30	12	64824571
1.44795	peroxisomal biogenesis factor 7	PEX7	6	136822563
1.65713	peptidylprolyl isomerase C	PPIC	5	-123023382
1.85703	long intergenic non-protein coding RNA 893	LINC00893	X	-149527590
0.892741	exocyst complex component 3	EXOC3	5	443218
-2.79395	potassium two pore domain channel subfamily K member 5	KCNK5	6	-39188970
-1.3339	semaphorin 4G	SEMA4G	10	100972528
-3.56512	glycine-N-acyltransferase like 1	GLYATL1	11	58943248
-1.12485	kinectin 1	KTN1	14	55580206
-0.861288	family with sequence similarity 30 member A	FAM30A	14	105917978
-0.528601	WD repeat domain 27	WDR27	6	-169657758
0.874086	WD repeat domain 7	WDR7	18	56651384
1.85002	ATP binding cassette subfamily C member 5	ABCC5	3	-183983751
-2.04004	ATP binding cassette subfamily A member 6	ABCA6	17	-69078705
-0.589279	PIK3CD antisense RNA 2	PIK3CD-AS2	1	-9672425
0.960929	CWC15 spliceosome associated protein homolog	CWC15	11	-94962621
1.02874	Rab geranylgeranyltransferase alpha subunit	RABGGTA	14	-24265537
-1.43182	eukaryotic translation initiation factor 5B	EIF5B	2	99337370
-0.647267	musashi RNA binding protein 1	MSI1	12	-120341329
-1.05688	secretin	SCT	11	-156214
-0.861827	chondroitin sulfate N-acetylgalactosaminyltransferase 2	CSGALNACT2	10	43138444
-0.864968	zinc finger with KRAB and SCAN domains 8	ZKSCAN8	6	28141909
-0.557636	taste 2 receptor member 50	TAS2R50	12	-10985912
0.675648	uncharacterized LOC105371414	LOC105371414	16	89296127
1.60756	dihydrouridine synthase 3 like	DUS3L	19	-5785141
-0.902929	mannosidase endo-alpha	MANEA	6	95577496
-0.444071	uncharacterized LOC112268013	LOC112268013	7	NA
-1.48343	zinc finger protein 253	ZNF253	19	19865829
-0.540092	spermatogenesis associated 42 (non-protein coding)	SPATA42	1	108857216
0.899145	transmembrane p24 trafficking protein 1	TMED1	19	-10832066
-0.658426	chromosome 17 open reading frame 98	C17orf98	17	-38835087
-1.56453	pleckstrin homology domain interacting protein	PHIP	6	-78934418
3.58479	unc-5 netrin receptor D	UNC5D	8	35235456
-0.890288	long intergenic non-protein coding RNA 654	LINC00654	20	-5496066
-1.52449	leptin receptor	LEPR	1	65420651
2.61097	C2 calcium dependent domain containing 4A	C2CD4A	15	62066976
1.57811	family with sequence similarity 210 member A	FAM210A	18	-13663346
-0.807584	uncharacterized LOC105371561	LOC105371561	1	NA
0.671855	tRNA methyltransferase 2 homolog A	TRMT2A	22	-20111865
-0.544889	Fc receptor like 1	FCRL1	1	-157794403
-0.990655	MIR7515 host gene	MIR7515HG	2	-6649106
-0.795198	uncharacterized LOC100506606	LOC100506606	12	-29280415
1.27789	nicotinamide nucleotide adenylyltransferase 3	NMNAT3	3	-139560180
1.04101	regulatory factor X associated ankyrin containing protein	RFXANK	19	19192198
1.29304	non-SMC condensin I complex subunit D2	NCAPD2	12	6494131
1.02889	myotubularin related protein 12	MTMR12	5	-32227006
-2.33141	solute carrier family 22 member 7	SLC22A7	6	43298259
1.00516	cytochrome c oxidase subunit 6B1	COX6B1	19	35648222
-1.2512	heparin binding growth factor	HDGF	1	-156742106
-0.832997	uncharacterized LOC107985795	LOC107985795	2	NA
3.60445	secretoglobin family 2A member 1	SCGB2A1	11	62208667
2.05115	G protein signaling modulator 2	GPSM2	1	108876980
2.84838	Rac GTPase activating protein 1	RACGAP1	12	-49989161
3.64059	protein tyrosine phosphatase, non-receptor type 20	PTPN20	10	46911721
1.30031	adaptor related protein complex 1 sigma 1 subunit	AP1S1	7	101154397
0.991242	NK6 homeobox 1	NKX6-1	4	-84493282
-0.48285	long intergenic non-protein coding RNA 2350	LINC02350	12	126426145
-0.849516	Kell blood group, metallo-endopeptidase	KEL	7	-142941113
1.03644	zinc finger protein 557	ZNF557	19	7069459
-1.25069	otoraplin	OTOR	20	16748352
-1.74797	kallikrein B1	KLKB1	4	186227470
0.958934	zinc finger protein 548	ZNF548	19	57389849
-0.848116	neurotrophic receptor tyrosine kinase 2	NTRK2	9	84669679
3.68346	phorbol-12-myristate-13-acetate-induced protein 1	PMAIP1	18	59899959
-1.02782	leucine rich repeat containing 25	LRRC25	19	-18391143
-1.00437	ZFP2 zinc finger protein	ZFP2	5	178895893
-3.43023	tyrosinase related protein 1	TYRP1	9	12693385
1.21089	solute carrier family 31 member 1	SLC31A1	9	113221527
-1.28551	non-homologous end joining factor 1	NHEJ1	2	-219075323
-0.446112	uncharacterized LOC105374397	LOC105374397	4	NA
-0.695373	uncharacterized LOC285638	LOC285638	5	-109237134
-0.728117	nitric oxide synthase 1	NOS1	12	-117208141
-0.668765	coiled-coil domain containing 158	CCDC158	4	-76313038
1.18178	BCL2 like 2	BCL2L2	14	23306859
-0.328492	KRT7 antisense RNA 1	KRT7-AS	12	-52245042
3.48953	ankyrin repeat domain 29	ANKRD29	18	-23598925
-0.958975	selectin P	SELP	1	-169588849
-1.8076	annexin A9	ANXA9	1	150982022
2.59084	calcium voltage-gated channel subunit alpha1 D	CACNA1D	3	53495048
2.10886	cyclin B1	CCNB1	5	69167009
5.72714	aldo-keto reductase family 1 member C2	AKR1C2	10	-4999910
-0.493366	CCDC37 divergent transcript	CCDC37-DT	3	-126393031
1.27338	RAB26, member RAS oncogene family	RAB26	16	2148649
3.93662	pregnancy specific beta-1-glycoprotein 4	PSG4	19	-43192701
1.04004	adaptor related protein complex 5 sigma 1 subunit	AP5S1	20	3820523
0.625993	F-box and leucine rich repeat protein 17	FBXL17	5	-107859032
-0.926957	uncharacterized LOC105374428	LOC105374428	4	-42299011
-1.0133	ankyrin repeat domain 26	ANKRD26	10	-27004115
1.89886	glutamate decarboxylase 1	GAD1	2	170816689
0.476941	zinc finger protein 549	ZNF549	19	57527324
-0.73679	ganglioside induced differentiation associated protein 2	GDAP2	1	-117863484
1.27471	A-kinase interacting protein 1	AKIP1	11	8911153
0.583333	MAGI family member, X-linked	MAGIX	X	49162842
-1.32778	WAS/WASL interacting protein family member 3	WIPF3	7	29806553
-2.10165	dachshund family transcription factor 1	DACH1	13	-71437965
-1.20697	solute carrier family 17 member 4	SLC17A4	6	25754698
-0.672401	PRMT5 antisense RNA 1	PRMT5-AS1	14	22919455
1.11964	BRCA1 associated protein 1	BAP1	3	-52401003
1.21604	family with sequence similarity 210 member B	FAM210B	20	56358926
0.868108	peroxisomal membrane protein 4	PXMP4	20	-33702743
1.08131	transducin beta like 3	TBL3	16	1972062
0.949706	glycerol-3-phosphate acyltransferase 4	GPAT4	8	41578187
2.33464	interferon alpha inducible protein 6	IFI6	1	-27666060
-6.16778	amine oxidase, copper containing 1	AOC1	7	150852476
1.68636	endoplasmic reticulum oxidoreductase 1 alpha	ERO1A	14	-52639914
1.65189	tumor suppressor candidate 1	TUSC1	9	-25676388
1.50878	Wnt family member 2	WNT2	7	-117276630
1.51177	selenoprotein I	SELENOI	2	26346085
1.08716	apolipoprotein B mRNA editing enzyme catalytic subunit 3F	APOBEC3F	22	39040667
-0.449284	long intergenic non-protein coding RNA 1192	LINC01192	3	-163177242
3.428	mucin 20, cell surface associated	MUC20	3	-62490
1.18262	cysteine rich with EGF like domains 1	CRELD1	3	9933839
1.09352	ring finger protein 113A	RNF113A	X	-119870531
0.858301	makorin ring finger protein 2	MKRN2	3	12557013
0.762419	transport and golgi organization 6 homolog	TANGO6	16	68843605
1.14293	mitochondrial ribosomal protein S35	MRPS35	12	27710772
-1.28491	WW and C2 domain containing 2	WWC2	4	183099309
1.74783	ring finger protein 4 pseudogene	LOC100419583	15	44728987
-2.41104	afamin	AFM	4	73481744
-0.557962	cytochrome P450 family 4 subfamily B member 1	CYP4B1	1	46798997
1.17069	ring finger protein 34	RNF34	12	121400117
-0.836379	syntaxin binding protein 4	STXBP4	17	54968764
1.73393	pecanex homolog 4	PCNX4	14	60091910
1.76944	TMEM9 domain family member B	TMEM9B	11	-8947200
-0.826605	signal transducing adaptor molecule 2	STAM2	2	-152116800
-0.58983	cilia and flagella associated protein 43	CFAP43	10	-104129887
0.818611	zinc finger with KRAB and SCAN domains 4	ZKSCAN4	6	-28241704
0.888901	RNA binding motif protein, X-linked 2	RBMX2	X	130401948
0.814735	charged multivesicular body protein 7	CHMP7	8	23243636
-0.591632	fibrous sheath CABYR binding protein	FSCB	14	-44504150
0.843054	zinc finger protein 101	ZNF101	19	19668787
-1.04368	StAR related lipid transfer domain containing 13	STARD13	13	-33103134
-1.00756	zinc finger protein 614	ZNF614	19	-52013323
-1.38232	SSX family member 2 interacting protein	SSX2IP	1	-84643706
1.27603	tripartite motif containing 35	TRIM35	8	-27284885
-1.66634	stonin 1	STON1	2	48530168
-0.388584	prostaglandin E synthase 3 like	PTGES3L	17	-42968087
-0.825579	olfactory receptor family 8 subfamily G member 1 (gene/pseudogene)	OR8G1	11	124249675
-1.34243	sterile alpha motif domain containing 9 like	SAMD9L	7	-93130053
4.47185	syntaxin binding protein 6	STXBP6	14	-24809654
1.12352	coronin 7	CORO7	16	-56866
0.459316	N-deacetylase and N-sulfotransferase 2	NDST2	10	-73801910
1.59894	ribonucleotide reductase catalytic subunit M1	RRM1	11	4094684
-0.783098	FAM83C antisense RNA 1	FAM83C-AS1	20	35285250
-1.30091	myosin light chain 3	MYL3	3	-46857866
-3.06502	tripartite motif containing 6	TRIM6	11	5596100
3.21993	ankyrin repeat and SOCS box containing 5	ASB5	4	-176213674
1.23067	nuclear transport factor 2 like export factor 1	NXT1	20	23350735
1.35284	cornichon family AMPA receptor auxiliary protein 4	CNIH4	1	224356810
-0.81616	small proline rich protein 3	SPRR3	1	153001746
1.12886	nucleosome assembly protein 1 like 4	NAP1L4	11	-175477
-1.36366	GRIP and coiled-coil domain containing 2	GCC2	2	108449120
1.48721	cyclin B2	CCNB2	15	59105084
0.569734	CCR4-NOT transcription complex subunit 9	CNOT9	2	218568579
0.696073	kelch like family member 18	KLHL18	3	47282839
-0.775353	uncharacterized LOC101930114	LOC101930114	1	-209661358
1.08744	NECAP endocytosis associated 1	NECAP1	12	8082210
-0.659102	twist family bHLH transcription factor 2	TWIST2	2	238848031
-1.99255	fucosyltransferase 6	FUT6	19	-5830625
1.29845	cytochrome c oxidase subunit 7B	COX7B	X	77899463
-1.66576	retinol dehydrogenase 12	RDH12	14	67701885
0.819109	HIC ZBTB transcriptional repressor 2	HIC2	22	21417403
-0.915591	keratin 81	KRT81	12	-52285912
-0.589891	growth differentiation factor 5	GDF5	20	-35433348
1.12918	mitogen-activated protein kinase associated protein 1	MAPKAP1	9	-125437393
-0.77021	long intergenic non-protein coding RNA 312	LINC00312	3	8571781
0.429988	long intergenic non-protein coding RNA 620	LINC00620	3	13650720
-0.64391	T cell receptor alpha variable 10	TRAV10	14	NA
2.10777	SBF2 antisense RNA 1	SBF2-AS1	11	9758292
1.17476	voltage dependent anion channel 3	VDAC3	8	42391760
-0.739487	MAGE family member C2	MAGEC2	X	-142202341
0.369289	uncharacterized LOC101927446	LOC101927446	7	90335222
0.694409	zinc finger SWIM-type containing 3	ZSWIM3	20	45857580
0.734946	distal-less homeobox 5	DLX5	7	-97020389
-1.65934	zinc finger protein 195	ZNF195	11	-3357926
0.961222	zinc finger with KRAB and SCAN domains 7	ZKSCAN7	3	44555174
-0.751392	synaptotagmin 9	SYT9	11	7251949
1.79128	GINS complex subunit 2	GINS2	16	-85677673
1.20608	AKT serine/threonine kinase 1	AKT1	14	-104769349
1.33995	dCMP deaminase	DCTD	4	-182890090
0.90308	NADH:ubiquinone oxidoreductase subunit A1	NDUFA1	X	119871770
-1.31132	p53-regulated lncRNA 1	LOC105371267	16	-53041484
1.51272	testis-specific transcript, Y-linked 15 (non-protein coding)	TTTY15	Y	12662366
0.571461	VPS39, HOPS complex subunit	VPS39	15	-42158700
1.23814	prohibitin pseudogene 19	PHBP19	12	NA
-1.13973	splicing factor 3b subunit 1	SF3B1	2	-197418796
3.88912	uridine phosphorylase 1	UPP1	7	48088602
1.45746	glucose-6-phosphate isomerase	GPI	19	34365119
-1.03906	aftiphilin	AFTPH	2	64524304
-1.34083	cell division cycle and apoptosis regulator 1	CCAR1	10	68721143
-0.777992	zinc finger protein 33A	ZNF33A	10	38010649
3.14187	tripartite motif containing 50	TRIM50	7	-73312535
0.878754	SART1, U4/U6.U5 tri-snRNP-associated protein 1	SART1	11	65961688
1.55248	VLDLR antisense RNA 1	VLDLR-AS1	9	-2535654
-4.91652	alanyl aminopeptidase, membrane	ANPEP	15	-89784894
-0.815062	keratin associated protein 17-1	KRTAP17-1	17	124565
1.38204	transforming acidic coiled-coil containing protein 3	TACC3	4	1721489
-1.43203	STAU2 antisense RNA 1	STAU2-AS1	8	73420073
[truncated: 18,483 more rows]
